# Supplementary material for: Resveratrol modulates the apoptosis and autophagic death of human lung adenocarcinoma A549 cells via a p53-dependent pathway: Integrated bioinformatics analysis and experimental validation
Source: PubMed Central journal article supplement — Int J Oncol. 2020 Aug 7;57(4):929–38. doi: 10.3892/ijo.2020.5107 (PMC7473753; doi:10.3892/ijo.2020.5107), 2020-08-07
Supplement: Supplementary_Data.pdf [file Supplementary_Data.pdf]

Table SI. Differentially expressed genes.

| Gene         | logFC    | AveExpr  | t value  | P-value  |
|--------------|----------|----------|----------|----------|
| VSTM2L       | 3.315942 | 6.756386 | 29.82869 | 5.67E-05 |
| AV703555     | 3.610744 | 5.880485 | 29.702   | 5.75E-05 |
| FAXDC2       | 3.526564 | 9.177221 | 26.72815 | 8.01E-05 |
| LENG9        | 3.270676 | 5.683114 | 23.88996 | 0.000114 |
| LOC101927507 | -2.94917 | 3.515774 | -23.7604 | 0.000116 |
| BC028967     | 3.56197  | 4.208635 | 22.95804 | 0.000129 |
| TMEM27       | 3.010875 | 8.053376 | 22.81882 | 0.000132 |
| QPRT         | 2.56467  | 7.272755 | 22.37587 | 0.00014  |
| TBC1D2       | 3.789191 | 6.823331 | 21.58772 | 0.000157 |
| AF085835     | 2.602455 | 4.690477 | 21.43982 | 0.00016  |
| TYROBP       | 2.386592 | 5.236329 | 21.41752 | 0.000161 |
| TSPAN1       | 3.057352 | 7.127327 | 21.36574 | 0.000162 |
| LOC253573    | 4.500209 | 2.911523 | 20.91289 | 0.000173 |
| TNNC1        | 2.913839 | 6.726644 | 20.82942 | 0.000175 |
| MGAM         | 2.35805  | 7.405973 | 20.68591 | 0.000179 |
| ZDHHC11      | -3.25279 | 5.412875 | -20.673  | 0.000179 |
| TRIM22       | 2.268602 | 8.214839 | 20.40775 | 0.000187 |
| AA06         | 2.716698 | 5.07658  | 20.20202 | 0.000193 |
| AV700385     | 3.724723 | 5.871881 | 20.18696 | 0.000193 |
| AW851069     | -2.2729  | 5.389451 | -19.8536 | 0.000204 |
| BC002465     | 2.590377 | 4.125253 | 19.57939 | 0.000213 |
| AU146893     | -2.63267 | 5.532153 | -18.9452 | 0.000236 |
| BC040270     | -2.63771 | 5.540716 | -18.6441 | 0.000248 |
| H28731       | 3.816856 | 6.686159 | 18.32359 | 0.000262 |
| LOC101927342 | -2.07689 | 4.258431 | -18.0208 | 0.000276 |
| TMC1         | 2.028162 | 4.977353 | 18.01518 | 0.000276 |
| KCNQ1DN      | -3.49551 | 4.538808 | -17.883  | 0.000282 |
| LOC101926934 | 2.786453 | 4.106976 | 17.85802 | 0.000284 |
| AL043897     | 3.449478 | 4.51258  | 17.66439 | 0.000293 |
| RARRES1      | 1.96055  | 8.281127 | 16.95242 | 0.000334 |
| FAM189A1     | -2.38147 | 4.48506  | -16.7163 | 0.000349 |
| IGDCC4       | 2.385577 | 10.00068 | 16.66958 | 0.000352 |
| KLK11        | 3.244328 | 5.290104 | 16.44339 | 0.000367 |
| GRID1-AS1    | 1.858777 | 5.714288 | 16.26821 | 0.00038  |
| UPK3B        | 2.044283 | 8.850582 | 15.96217 | 0.000403 |
| SPATA18      | 2.143072 | 8.258774 | 15.94032 | 0.000405 |
| CDKN1A       | 1.794641 | 11.9589  | 15.77992 | 0.000418 |
| DEFB1        | 3.050052 | 5.229563 | 15.58506 | 0.000434 |
| CORO2A       | 2.336442 | 6.833962 | 15.5047  | 0.000441 |
| LINC00692    | 2.261178 | 3.584956 | 15.32805 | 0.000457 |
| MIR7515HG    | -1.96416 | 4.158171 | -15.2762 | 0.000462 |
| RBP4         | 1.68105  | 7.85298  | 15.20012 | 0.000469 |
| TMEM52B      | 5.252074 | 4.272405 | 15.10433 | 0.000479 |
| AI400672     | -2.97257 | 4.077885 | -14.8956 | 0.0005   |
| BC021687     | 2.385626 | 3.89685  | 14.48206 | 0.000546 |
| BC037923     | 2.310784 | 2.877756 | 14.45159 | 0.000549 |
| AV693734     | -1.7106  | 3.778555 | -14.4043 | 0.000555 |
| NEURL1B      | 1.737988 | 8.669084 | 14.40002 | 0.000555 |
| PEAR1        | 1.787018 | 7.812724 | 14.32818 | 0.000564 |
| C1orf116     | 2.103145 | 7.208074 | 14.23579 | 0.000576 |
| N29850       | 2.781422 | 5.157215 | 14.23194 | 0.000576 |
| VNN1         | 2.025217 | 3.805539 | 14.16868 | 0.000584 |
| HIST1H1D     | -1.99116 | 9.240933 | -14.0998 | 0.000593 |
| AL833282     | 2.071204 | 5.817136 | 14.03806 | 0.000601 |
| LOC100127938 | 2.780044 | 5.854607 | 13.85468 | 0.000626 |
| SLC52A1      | 3.201688 | 7.446816 | 13.83415 | 0.000629 |

Table SI. Continued.

| Gene         | logFC    | AveExpr  | t value  | P-value  |
|--------------|----------|----------|----------|----------|
| BE672557     | 2.379638 | 4.535286 | 13.79214 | 0.000635 |
| NFKBIL1      | -1.56765 | 6.419714 | -13.7209 | 0.000645 |
| LOC100506858 | -3.03139 | 6.114243 | -13.7085 | 0.000647 |
| BG054960     | 1.809012 | 7.172666 | 13.67516 | 0.000652 |
| N71463       | 1.588891 | 6.062763 | 13.63771 | 0.000658 |
| LILRB5       | 2.867612 | 4.088767 | 13.59862 | 0.000664 |
| LINC01588    | 1.868439 | 8.555823 | 13.59846 | 0.000664 |
| LRTM1        | 1.522162 | 6.352817 | 13.52458 | 0.000675 |
| AK023632     | 2.277046 | 4.767131 | 13.50787 | 0.000678 |
| AI674525     | -1.50647 | 4.801833 | -13.4669 | 0.000684 |
| BG704430     | 3.482449 | 5.743421 | 13.4372  | 0.000689 |
| FDXR         | 1.858406 | 11.33025 | 13.41252 | 0.000693 |
| TIMP4        | 2.091393 | 9.116852 | 13.39702 | 0.000695 |
| CT60         | 1.615618 | 7.424148 | 13.37105 | 0.000699 |
| BF058942     | 1.907087 | 5.916963 | 13.2149  | 0.000725 |
| C14394       | 2.75577  | 4.978498 | 13.21161 | 0.000726 |
| NEXN-AS1     | 3.017202 | 4.530818 | 13.1892  | 0.00073  |
| BC035670     | 2.684992 | 5.63917  | 13.17233 | 0.000733 |
| S100P        | 1.593645 | 11.73021 | 13.17061 | 0.000733 |
| AU158436     | -1.5411  | 4.396648 | -13.1426 | 0.000738 |
| AMIGO1       | 2.539616 | 6.983491 | 13.05398 | 0.000754 |
| AI435747     | -2.33009 | 4.633135 | -13.0455 | 0.000755 |
| TM4SF20      | 1.842722 | 9.647606 | 13.01274 | 0.000761 |
| AY143171     | -1.8607  | 3.372549 | -12.9421 | 0.000774 |
| MYOG         | -1.66053 | 5.539947 | -12.8692 | 0.000788 |
| PRTFDC1      | 1.426656 | 10.31332 | 12.73794 | 0.000813 |
| BE815259     | 1.441375 | 7.750306 | 12.72454 | 0.000816 |
| PVRL3-AS1    | 1.886056 | 3.501358 | 12.69305 | 0.000822 |
| LOC283435    | 2.401103 | 5.977138 | 12.68909 | 0.000823 |
| FAM155A-IT1  | 1.451712 | 3.278502 | 12.67624 | 0.000826 |
| NUPR1        | 1.423892 | 9.778824 | 12.66214 | 0.000828 |
| AW510778     | 1.544668 | 5.939725 | 12.64225 | 0.000832 |
| BC043155     | 4.255476 | 1.799265 | 12.56311 | 0.000849 |
| R78727       | 2.755706 | 3.392662 | 12.56209 | 0.000849 |
| LINC01242    | -2.81545 | 1.939205 | -12.5614 | 0.000849 |
| AK024554     | 2.630001 | 3.789147 | 12.5337  | 0.000855 |
| ZNF687       | 1.913428 | 7.829027 | 12.51293 | 0.000859 |
| GRHL3        | 2.596926 | 7.183403 | 12.50326 | 0.000862 |
| CCDC129      | 2.499667 | 5.022722 | 12.47407 | 0.000868 |
| TM4SF4       | 1.521316 | 9.611053 | 12.45506 | 0.000872 |
| LSR          | 1.619477 | 8.871291 | 12.45068 | 0.000873 |
| ZNF155       | 1.820329 | 6.645153 | 12.39739 | 0.000885 |
| BF476809     | 1.805998 | 6.025206 | 12.36414 | 0.000892 |
| MYOZ2        | -1.8944  | 3.337917 | -12.3588 | 0.000893 |
| GSDMD        | 2.554476 | 6.774318 | 12.358   | 0.000893 |
| ZNF880       | 1.390811 | 5.473289 | 12.30758 | 0.000905 |
| AW515648     | 3.005659 | 3.997473 | 12.2978  | 0.000907 |
| CSF2RA       | 1.892477 | 7.546396 | 12.25982 | 0.000916 |
| AI694281     | 4.050861 | 4.992206 | 12.24976 | 0.000918 |
| FUT9         | 1.877571 | 4.817666 | 12.1801  | 0.000934 |
| DDB2         | 1.345661 | 11.08912 | 12.13942 | 0.000944 |
| BDH1         | 2.191814 | 6.167344 | 12.12187 | 0.000948 |
| LOC101927660 | 2.730885 | 3.902966 | 12.09616 | 0.000955 |
| AI264135     | -2.03077 | 4.817154 | -12.0855 | 0.000957 |
| LOC101928052 | -3.3803  | 1.7156   | -12.0718 | 0.000961 |
| BC035239     | -3.89076 | 3.304434 | -12.0554 | 0.000965 |

Table SI. Continued.

| Gene         | logFC    | AveExpr  | t value  | P-value  |
|--------------|----------|----------|----------|----------|
| C3           | 2.402285 | 8.678482 | 12.0492  | 0.000966 |
| RAB37        | 1.415658 | 7.723512 | 12.04136 | 0.000968 |
| RRAD         | 1.943176 | 5.759072 | 12.02919 | 0.000971 |
| LOC101927934 | 2.702692 | 6.51871  | 12.00951 | 0.000976 |
| AK026789     | -1.34573 | 5.004181 | -11.98   | 0.000984 |
| CCR4         | -1.82388 | 4.963711 | -11.9282 | 0.000997 |
| CSTA         | 1.99251  | 8.791654 | 11.90215 | 0.001004 |
| S82075       | 2.893633 | 6.012357 | 11.86192 | 0.001014 |
| RAB3B        | 1.479138 | 9.225656 | 11.83691 | 0.001021 |
| AL831861     | 2.01035  | 3.785029 | 11.81924 | 0.001026 |
| ASS1         | 1.390365 | 10.1604  | 11.74274 | 0.001046 |
| MFGE8        | 1.77874  | 11.06481 | 11.72156 | 0.001052 |
| CD70         | 1.324111 | 9.635068 | 11.68819 | 0.001062 |
| LOC101928666 | -2.5605  | 5.380323 | -11.6609 | 0.001069 |
| GALNTL5      | -1.49844 | 3.739225 | -11.6445 | 0.001074 |
| VAMP8        | 1.502982 | 9.763767 | 11.62196 | 0.00108  |
| C20orf85     | -2.24775 | 2.851112 | -11.6213 | 0.001081 |
| PTPRZ1       | 3.658058 | 4.218343 | 11.61482 | 0.001083 |
| DGKA         | 1.322323 | 9.192282 | 11.59879 | 0.001087 |
| GP9          | 2.500937 | 6.404213 | 11.57906 | 0.001093 |
| NIPAL4       | 2.624194 | 7.819239 | 11.42399 | 0.001139 |
| TMEM255A     | 2.995495 | 5.435727 | 11.39469 | 0.001149 |
| RBP3         | -2.24485 | 5.036941 | -11.3683 | 0.001157 |
| CDKN2B       | -1.89104 | 3.039968 | -11.3337 | 0.001168 |
| FAM227B      | 2.410824 | 3.578343 | 11.31501 | 0.001174 |
| AI633559     | 2.121319 | 6.760388 | 11.29687 | 0.00118  |
| AW976746     | -1.95809 | 3.598524 | -11.2929 | 0.001181 |
| ZNF853       | 1.451185 | 6.924699 | 11.23398 | 0.0012   |
| IGFBP7       | 1.427838 | 10.53188 | 11.2207  | 0.001204 |
| BE220061     | 1.608029 | 5.806626 | 11.19405 | 0.001213 |
| BC043411     | 1.308072 | 10.98775 | 11.1819  | 0.001217 |
| OR10A4       | 1.329219 | 4.322089 | 11.05012 | 0.001263 |
| AU156421     | 2.876414 | 5.132179 | 11.04854 | 0.001263 |
| AI393753     | 2.07284  | 4.875436 | 11.03271 | 0.001269 |
| SERPINH1     | 1.288388 | 11.08229 | 11.02747 | 0.001271 |
| LOC100996667 | 1.241664 | 4.345344 | 10.98978 | 0.001284 |
| LOC101927272 | 2.175413 | 5.19787  | 10.96885 | 0.001292 |
| SUSD5        | 1.390121 | 7.048503 | 10.87517 | 0.001327 |
| BE466813     | 2.147209 | 5.379457 | 10.86927 | 0.001329 |
| LAMB3        | 2.511113 | 8.643206 | 10.85311 | 0.001335 |
| AI052441     | 1.838621 | 3.690048 | 10.83756 | 0.001341 |
| AI791832     | 1.601604 | 5.696824 | 10.8363  | 0.001341 |
| AW300085     | 2.214769 | 6.380077 | 10.74971 | 0.001375 |
| AI806045     | -2.2031  | 4.538152 | -10.7458 | 0.001377 |
| TP53I3       | 1.249813 | 12.5934  | 10.70614 | 0.001392 |
| LOC100506107 | -2.62828 | 4.535864 | -10.6738 | 0.001405 |
| PTTG2        | 3.011008 | 5.627706 | 10.63686 | 0.001421 |
| PTH          | 2.874757 | 4.176697 | 10.62665 | 0.001425 |
| FAS          | 1.44509  | 10.16051 | 10.62649 | 0.001425 |
| FAM129A      | 1.350706 | 8.490042 | 10.60989 | 0.001432 |
| AL049245     | 1.326841 | 8.4554   | 10.60713 | 0.001433 |
| MITF         | 1.268141 | 9.185728 | 10.59237 | 0.001439 |
| C5           | 1.42448  | 10.69587 | 10.59077 | 0.00144  |
| CSPG4P5      | 2.873052 | 5.986326 | 10.58416 | 0.001442 |
| AA573452     | 2.655301 | 5.395644 | 10.51268 | 0.001473 |
| MC3R         | 4.131579 | 5.337043 | 10.4987  | 0.001479 |

Table SI. Continued.

| Gene         | logFC    | AveExpr  | t value  | P-value  |
|--------------|----------|----------|----------|----------|
| GPR1         | 2.706085 | 5.596887 | 10.47585 | 0.001489 |
| TNIP3        | 2.193673 | 5.147445 | 10.47495 | 0.001489 |
| CT62         | 2.404703 | 5.812413 | 10.47489 | 0.001489 |
| SESN1        | 1.434575 | 9.760967 | 10.46434 | 0.001494 |
| R51383       | -1.83937 | 2.432282 | -10.3915 | 0.001526 |
| SCEL         | 2.506745 | 5.572456 | 10.36453 | 0.001539 |
| C12orf50     | -2.5015  | 4.304867 | -10.362  | 0.00154  |
| AU158358     | -1.33536 | 8.56331  | -10.3362 | 0.001552 |
| BF055302     | -1.85016 | 2.665731 | -10.2926 | 0.001572 |
| BC003386     | -2.42574 | 2.786379 | -10.2858 | 0.001575 |
| MT4          | -1.40253 | 4.515781 | -10.2831 | 0.001577 |
| LOC100996506 | 1.349195 | 9.148909 | 10.27547 | 0.00158  |
| IGFBP1       | 1.429366 | 7.910428 | 10.25366 | 0.001591 |
| LBH          | 1.477889 | 12.09966 | 10.24367 | 0.001595 |
| BI464586     | 3.490976 | 3.14684  | 10.22953 | 0.001602 |
| FAM212A      | 2.143734 | 6.613242 | 10.22545 | 0.001604 |
| AA018968     | 4.650137 | 3.400306 | 10.22156 | 0.001606 |
| BC014996     | 1.717255 | 7.061987 | 10.18418 | 0.001624 |
| THBD         | 1.559632 | 8.73587  | 10.16676 | 0.001633 |
| AF090916     | -1.37307 | 5.013408 | -10.1554 | 0.001638 |
| BC033994     | 1.800136 | 1.030035 | 10.14321 | 0.001644 |
| AY008263     | -1.90865 | 4.181729 | -10.1203 | 0.001656 |
| IFIT1        | 1.673532 | 8.363893 | 10.05525 | 0.001689 |
| HOGA1        | 1.62027  | 8.33271  | 10.04875 | 0.001692 |
| LOC100506790 | 3.097443 | 5.853809 | 10.02651 | 0.001704 |
| LRR69        | 1.76394  | 5.919733 | 10.00908 | 0.001713 |
| AA677952     | -2.37873 | 3.75915  | -9.99336 | 0.001721 |
| ATP13A4-AS1  | -1.77651 | 2.70476  | -9.99093 | 0.001723 |
| BLNK         | 3.330914 | 5.870774 | 9.948743 | 0.001745 |
| LGALS3BP     | 1.22149  | 11.15467 | 9.936605 | 0.001752 |
| BF725383     | -2.5664  | 3.272813 | -9.93362 | 0.001753 |
| BQ025203     | 1.609563 | 5.326006 | 9.92742  | 0.001757 |
| ABCA12       | 3.215385 | 5.523914 | 9.875493 | 0.001785 |
| ERFE         | 1.212398 | 8.984747 | 9.866062 | 0.001791 |
| RFTN1        | 1.214788 | 8.17392  | 9.858587 | 0.001795 |
| LINC01587    | -1.4601  | 4.636877 | -9.83645 | 0.001807 |
| PSMB8        | 2.053774 | 8.460787 | 9.828781 | 0.001812 |
| CXXC4        | 1.478427 | 6.480302 | 9.824682 | 0.001814 |
| AK093628     | 1.433649 | 5.47998  | 9.824299 | 0.001814 |
| AW028823     | -1.63657 | 2.278676 | -9.81418 | 0.00182  |
| LOC107161159 | 1.355157 | 4.410842 | 9.807493 | 0.001824 |
| KRTAP9-3     | 1.580976 | 5.688475 | 9.807163 | 0.001824 |
| AA704588     | -2.65442 | 4.745997 | -9.79095 | 0.001833 |
| ATP6V0A4     | 2.485309 | 5.769538 | 9.787404 | 0.001835 |
| PLA2G2A      | 2.087648 | 5.687742 | 9.783417 | 0.001838 |
| KRT4         | 1.639756 | 8.650185 | 9.718112 | 0.001876 |
| U38460       | 1.792222 | 5.422486 | 9.716867 | 0.001876 |
| TMC3-AS1     | 1.855125 | 6.835887 | 9.706268 | 0.001883 |
| SERPINF2     | 1.45405  | 7.919818 | 9.681729 | 0.001897 |
| LOC100131864 | -2.28311 | 5.740978 | -9.64444 | 0.00192  |
| AW243272     | -1.92139 | 5.58778  | -9.63672 | 0.001925 |
| AI003508     | 1.566379 | 6.032212 | 9.619154 | 0.001936 |
| BG150083     | 1.94747  | 5.981847 | 9.608754 | 0.001942 |
| CIDECP       | 2.106804 | 7.38127  | 9.592102 | 0.001952 |
| AW611486     | 1.661873 | 4.525368 | 9.589008 | 0.001954 |
| CPEB2-AS1    | -2.38013 | 2.421525 | -9.58826 | 0.001955 |

Table SI. Continued.

| Gene         | logFC    | AveExpr  | t value  | P-value  |
|--------------|----------|----------|----------|----------|
| MTTP         | -1.31227 | 3.140362 | -9.56451 | 0.00197  |
| AI821602     | -2.54003 | 6.029961 | -9.54739 | 0.001981 |
| SPATA45      | 3.699805 | 5.664665 | 9.531035 | 0.001991 |
| TP53INP1     | 1.367773 | 8.349283 | 9.505805 | 0.002007 |
| LAMP3        | 1.792746 | 6.904771 | 9.481443 | 0.002023 |
| DCTN1-AS1    | 2.793027 | 4.463089 | 9.479658 | 0.002024 |
| BE503692     | 2.167211 | 3.384677 | 9.469755 | 0.002031 |
| PRLHR        | 1.5485   | 4.789429 | 9.414166 | 0.002068 |
| LOC57399     | 1.239873 | 5.304702 | 9.411853 | 0.002069 |
| BF059726     | 4.257323 | 4.165088 | 9.407813 | 0.002072 |
| H23551       | 1.286496 | 5.845371 | 9.385033 | 0.002088 |
| LOC645261    | 3.281617 | 4.556541 | 9.377636 | 0.002093 |
| BF642798     | -1.84742 | 5.855107 | -9.35978 | 0.002105 |
| BC018690     | 1.800428 | 5.99745  | 9.247047 | 0.002184 |
| AK097122     | -1.43836 | 2.162647 | -9.22952 | 0.002197 |
| AY094612     | -1.24697 | 10.05366 | -9.18504 | 0.00223  |
| AF085926     | 1.44958  | 6.02864  | 9.177285 | 0.002236 |
| AI248622     | 1.222576 | 6.457736 | 9.167835 | 0.002243 |
| HEXA-AS1     | -2.51472 | 3.544773 | -9.12382 | 0.002276 |
| LOC100133131 | 1.633351 | 2.693735 | 9.120033 | 0.002279 |
| LOC101927523 | 1.452833 | 5.499806 | 9.100002 | 0.002294 |
| EPS8L2       | 1.595463 | 9.388648 | 9.075169 | 0.002314 |
| AI252081     | -1.63213 | 0.028793 | -9.07077 | 0.002317 |
| BE467801     | 1.945949 | 4.727248 | 9.060772 | 0.002325 |
| SLC38A11     | 1.451618 | 6.571936 | 9.009755 | 0.002365 |
| INPP1        | 1.415543 | 10.77656 | 9.000761 | 0.002372 |
| SLC12A8      | 2.241265 | 5.623334 | 8.990649 | 0.002381 |
| AI991943     | -1.44569 | 3.414932 | -8.98594 | 0.002384 |
| LINC01297    | 1.524038 | 8.817677 | 8.973172 | 0.002395 |
| LOC157860    | 2.128507 | 5.767413 | 8.957586 | 0.002408 |
| ACER2        | 1.846907 | 7.837684 | 8.947482 | 0.002416 |
| DCHS2        | -1.4535  | 4.009629 | -8.88663 | 0.002467 |
| CYFIP2       | 1.407271 | 9.705935 | 8.860863 | 0.002489 |
| ZNF257       | 1.270014 | 3.145325 | 8.855327 | 0.002494 |
| R61291       | -2.59116 | 5.280567 | -8.85209 | 0.002496 |
| 4-Mar        | 1.37569  | 9.14429  | 8.828937 | 0.002516 |
| AV658581     | 1.60363  | 4.424904 | 8.826585 | 0.002518 |
| KRT19        | 1.494916 | 8.95861  | 8.819183 | 0.002525 |
| TRPC2        | 1.226029 | 3.353616 | 8.806749 | 0.002536 |
| AA608964     | -1.95241 | 1.981331 | -8.80446 | 0.002538 |
| FAM46A       | 1.270288 | 7.862474 | 8.78359  | 0.002556 |
| NCF2         | 2.760544 | 6.606935 | 8.771618 | 0.002567 |
| LINC00574    | 2.249775 | 6.791384 | 8.755272 | 0.002582 |
| AL833240     | -1.65293 | 2.161507 | -8.75507 | 0.002582 |
| H18218       | -1.37826 | 4.490465 | -8.73757 | 0.002598 |
| AK021554     | -2.4709  | 5.362755 | -8.72492 | 0.002609 |
| BC034574     | 3.864257 | 4.474607 | 8.713722 | 0.002619 |
| EPYC         | 3.766104 | 4.012238 | 8.699229 | 0.002633 |
| UFSP1        | 1.948698 | 6.443554 | 8.692202 | 0.002639 |
| MPZ          | 1.903851 | 6.736655 | 8.685898 | 0.002645 |
| TCF24        | 2.95025  | 4.669238 | 8.680835 | 0.00265  |
| BF433388     | 2.976116 | 4.387734 | 8.671808 | 0.002658 |
| PPP1R14C     | 2.705083 | 6.274473 | 8.65516  | 0.002674 |
| PHEX-AS1     | 1.521231 | 6.686962 | 8.633589 | 0.002694 |
| LOC100128840 | 1.20454  | 7.193791 | 8.627524 | 0.0027   |
| LOC101927345 | 1.324402 | 11.92422 | 8.627025 | 0.0027   |

Table SI. Continued.

| Gene         | logFC    | AveExpr  | t value  | P-value  |
|--------------|----------|----------|----------|----------|
| HIST1H2AL    | 1.870418 | 5.727111 | 8.623384 | 0.002704 |
| SLC25A31     | 2.138143 | 3.63735  | 8.603476 | 0.002723 |
| ZMAT5        | 1.531081 | 7.812069 | 8.602834 | 0.002724 |
| NPL          | 1.325335 | 6.749062 | 8.596443 | 0.00273  |
| LOC100131053 | 2.149702 | 5.03657  | 8.555217 | 0.00277  |
| LOC105378732 | 2.754159 | 5.782445 | 8.551452 | 0.002774 |
| CGREF1       | 1.369055 | 6.578849 | 8.540082 | 0.002785 |
| AF130083     | -1.83934 | 4.024994 | -8.53568 | 0.00279  |
| GADD45A      | 1.741579 | 11.28736 | 8.534251 | 0.002791 |
| DLGAP1-AS3   | -1.3365  | 5.046458 | -8.50196 | 0.002823 |
| PGLYRP1      | 1.437676 | 4.154223 | 8.493421 | 0.002832 |
| BC035383     | -2.93301 | 5.032841 | -8.48855 | 0.002837 |
| BE644953     | 2.468873 | 4.646319 | 8.482024 | 0.002844 |
| ZNF385C      | 1.873698 | 6.25152  | 8.46066  | 0.002866 |
| XPNPEP2      | 1.350052 | 5.956146 | 8.459708 | 0.002867 |
| AI631201     | 5.641072 | 4.053979 | 8.457199 | 0.002869 |
| AL713704     | -3.28894 | 3.4322   | -8.43957 | 0.002887 |
| BF509725     | 1.391793 | 7.121011 | 8.43296  | 0.002894 |
| PCSK5        | 1.252172 | 7.109181 | 8.408571 | 0.00292  |
| PEX11G       | 1.432328 | 6.969083 | 8.408117 | 0.00292  |
| PSCA         | -1.34153 | 5.672834 | -8.38663 | 0.002943 |
| BTC          | 1.476511 | 7.004424 | 8.380355 | 0.00295  |
| BF514993     | 1.829477 | 5.478576 | 8.352638 | 0.00298  |
| AW406163     | -1.58349 | 5.978268 | -8.34351 | 0.00299  |
| MDK          | 2.845765 | 7.6059   | 8.303811 | 0.003033 |
| AI990790     | -1.29425 | 3.390299 | -8.27871 | 0.003062 |
| NEFL         | 1.288297 | 9.804594 | 8.264468 | 0.003078 |
| MR1          | 1.272655 | 8.186848 | 8.261039 | 0.003081 |
| PXN-AS1      | -1.42204 | 7.734855 | -8.25924 | 0.003084 |
| R60900       | -2.19749 | 4.656336 | -8.25596 | 0.003087 |
| AA916935     | 1.7221   | 5.784409 | 8.250163 | 0.003094 |
| PLCL2        | 1.581045 | 7.754485 | 8.229498 | 0.003118 |
| CSDC2        | 2.408706 | 5.722285 | 8.203049 | 0.003148 |
| KIAA0408     | -2.54825 | 2.861106 | -8.18204 | 0.003173 |
| R37691       | -2.27254 | 5.866774 | -8.16927 | 0.003188 |
| AI655311     | 2.042948 | 5.804987 | 8.121365 | 0.003245 |
| AU146686     | -1.35179 | 6.65807  | -8.11957 | 0.003248 |
| LUM          | 1.269266 | 5.423985 | 8.106551 | 0.003263 |
| MYOT         | 2.573894 | 4.510477 | 8.08041  | 0.003296 |
| DECR2        | 2.766484 | 8.658789 | 8.065819 | 0.003314 |
| CRYAB        | 1.519523 | 7.796251 | 8.061762 | 0.003319 |
| LOC727916    | 1.569486 | 6.249124 | 8.050478 | 0.003333 |
| NPBWR2       | -1.91369 | 4.043113 | -8.0427  | 0.003343 |
| AI826444     | 2.56328  | 5.120872 | 8.035372 | 0.003352 |
| TMEM38A      | 2.641885 | 4.939314 | 7.999657 | 0.003398 |
| LOC100507562 | 2.2222   | 5.565401 | 7.989264 | 0.003411 |
| ANXA3        | 1.244769 | 12.01324 | 7.972252 | 0.003433 |
| PMAIP1       | 1.270778 | 10.73303 | 7.971437 | 0.003434 |
| AF086391     | 1.614882 | 4.235848 | 7.971369 | 0.003434 |
| BC016356     | -2.53203 | 3.251957 | -7.93818 | 0.003478 |
| ALOX15       | 1.653455 | 3.648188 | 7.935206 | 0.003482 |
| LOX          | 1.227309 | 5.423607 | 7.91102  | 0.003514 |
| MGARP        | 2.058859 | 7.588805 | 7.900964 | 0.003528 |
| C4BPB        | 2.474838 | 6.763968 | 7.890162 | 0.003542 |
| GPR45        | 1.732495 | 5.095144 | 7.875428 | 0.003563 |
| AI074467     | -1.20898 | 4.674414 | -7.87471 | 0.003564 |



Table SI. Continued.

| Gene         | logFC    | AveExpr  | t value  | P-value  |
|--------------|----------|----------|----------|----------|
| SCARF2       | 1.495893 | 4.139842 | 7.861445 | 0.003582 |
| LOC101928767 | -1.86219 | 3.913861 | -7.82615 | 0.003631 |
| GC           | -2.03795 | 3.807353 | -7.82229 | 0.003636 |
| TNFRSF13C    | 1.322536 | 4.826261 | 7.781423 | 0.003694 |
| DEFB108B     | -2.50959 | 4.007151 | -7.76052 | 0.003725 |
| LOC101927760 | -1.96125 | 4.048249 | -7.7181  | 0.003787 |
| AW303454     | 1.687114 | 6.558223 | 7.694437 | 0.003822 |
| LOC403312    | 2.146289 | 1.583734 | 7.67763  | 0.003848 |
| AI655950     | -1.20116 | 4.815294 | -7.67002 | 0.003859 |
| ISLR         | 2.909634 | 5.594932 | 7.665783 | 0.003866 |
| BC039543     | 2.763943 | 5.001643 | 7.647701 | 0.003893 |
| LOC101928697 | -2.54031 | 2.795273 | -7.64696 | 0.003894 |
| BCL2A1       | 1.547412 | 9.88743  | 7.63859  | 0.003907 |
| T90554       | -1.40816 | 3.712095 | -7.59467 | 0.003976 |
| KLHL26       | 1.817467 | 6.76536  | 7.57794  | 0.004003 |
| TPTE2P6      | 3.773535 | 4.804426 | 7.571779 | 0.004012 |
| DUOXA1       | -1.39834 | 5.861226 | -7.5579  | 0.004035 |
| LINC00163    | 1.529144 | 7.093884 | 7.535533 | 0.004071 |
| TMEM221      | 1.855207 | 6.172448 | 7.534763 | 0.004072 |
| ITGB2-AS1    | 2.038978 | 4.829736 | 7.521052 | 0.004095 |
| N55299       | -3.53772 | 2.810536 | -7.51946 | 0.004097 |
| AI161380     | -2.35961 | 6.666066 | -7.50885 | 0.004115 |
| DOCK4-AS1    | -1.27113 | 2.028315 | -7.48731 | 0.004151 |
| AW449644     | -2.56782 | 4.814499 | -7.44247 | 0.004227 |
| BE502455     | -2.43725 | 4.45372  | -7.42765 | 0.004252 |
| FAR2         | 1.571196 | 4.495623 | 7.421733 | 0.004262 |
| AV704053     | -1.30858 | 3.809365 | -7.41298 | 0.004277 |
| HBQ1         | 1.457307 | 4.559846 | 7.399338 | 0.004301 |
| AK002066     | -2.73517 | 5.58509  | -7.38346 | 0.004329 |
| ZMYND10      | 1.214032 | 5.955418 | 7.375841 | 0.004343 |
| B3GALNT1     | 1.431359 | 4.67981  | 7.373435 | 0.004347 |
| C15orf52     | 2.431048 | 7.366728 | 7.357558 | 0.004375 |
| MAGEB18      | 3.093641 | 3.553754 | 7.347637 | 0.004393 |
| ASIC4        | 1.298424 | 6.211955 | 7.346963 | 0.004394 |
| AL109705     | 2.217196 | 4.358695 | 7.341389 | 0.004404 |
| ENTPD3-AS1   | 2.874568 | 4.098539 | 7.339896 | 0.004407 |
| ARC          | 1.560717 | 3.994121 | 7.339007 | 0.004409 |
| LOC101928271 | 2.120223 | 2.103872 | 7.318006 | 0.004447 |
| BC015237     | 2.534507 | 6.065148 | 7.316175 | 0.00445  |
| HOOK1        | 1.514879 | 6.229846 | 7.288886 | 0.004501 |
| LOC101928111 | 2.039971 | 5.548585 | 7.277946 | 0.004521 |
| AI732318     | -3.80176 | 2.934073 | -7.23729 | 0.004598 |
| BF589163     | -1.72367 | 4.122989 | -7.21841 | 0.004634 |
| FRMD3        | 1.316876 | 7.989694 | 7.214792 | 0.004641 |
| AU157675     | -2.4618  | 3.078425 | -7.20801 | 0.004654 |
| LINC00417    | 2.158732 | 5.373622 | 7.193664 | 0.004682 |
| AL049314     | -1.90847 | 2.956229 | -7.19219 | 0.004685 |
| BC034593     | 1.761304 | 6.73454  | 7.170012 | 0.004729 |
| BM144812     | -1.91472 | 2.544145 | -7.16716 | 0.004734 |
| ITGB4        | 1.687027 | 8.332341 | 7.157725 | 0.004753 |
| PLCZ1        | -2.02001 | 3.728343 | -7.15746 | 0.004754 |
| LINC00545    | -1.29348 | 4.649684 | -7.13752 | 0.004794 |
| CXorf21      | 2.667518 | 6.008347 | 7.132187 | 0.004805 |
| H98180       | 4.085446 | 4.359726 | 7.130935 | 0.004807 |
| IFITM10      | 1.572141 | 5.839964 | 7.123024 | 0.004823 |
| TPSD1        | -1.35147 | 4.62693  | -7.11232 | 0.004845 |

Table SI. Continued.

| Gene         | logFC    | AveExpr  | t value  | P-value  |
|--------------|----------|----------|----------|----------|
| BM805933     | 2.790972 | 4.893208 | 7.109951 | 0.00485  |
| AF043586     | -1.43952 | 4.678985 | -7.0857  | 0.0049   |
| AI808120     | 2.145959 | 5.39017  | 7.077393 | 0.004917 |
| LOC101928847 | 1.577674 | 5.496549 | 7.071937 | 0.004928 |
| AL049301     | 1.449271 | 5.575609 | 7.064995 | 0.004943 |
| N64035       | 1.662561 | 3.805649 | 7.057604 | 0.004959 |
| EDNRB        | 1.984311 | 4.354731 | 7.04798  | 0.004979 |
| LOC101930578 | 1.474791 | 8.270954 | 7.046555 | 0.004982 |
| LOC100130278 | 1.856149 | 5.90699  | 7.046123 | 0.004983 |
| HIST1H3A     | 3.590255 | 4.313406 | 7.043446 | 0.004989 |
| C19orf68     | -1.81716 | 4.568275 | -7.03638 | 0.005004 |
| LOC105377421 | 2.654176 | 3.235653 | 7.024644 | 0.005029 |
| ALOX12B      | 1.222459 | 4.562194 | 7.011407 | 0.005057 |
| LINC01107    | 1.352397 | 7.488314 | 6.996834 | 0.005089 |
| AI684971     | 2.297317 | 1.724269 | 6.982406 | 0.00512  |
| NAALADL2     | 1.649279 | 4.040273 | 6.969415 | 0.005149 |
| X86400       | 1.837077 | 2.550906 | 6.951016 | 0.00519  |
| SLC23A1      | 1.234274 | 8.238284 | 6.944486 | 0.005205 |
| CCDC88B      | 1.222789 | 7.700139 | 6.94434  | 0.005205 |
| AI797677     | -1.74426 | 5.37697  | -6.93659 | 0.005222 |
| R51605       | -1.25188 | 5.5146   | -6.93413 | 0.005228 |
| BC036484     | 2.128396 | 4.379208 | 6.914244 | 0.005273 |
| AA424811     | 2.729908 | 6.924251 | 6.861089 | 0.005396 |
| RAET1E       | 2.349647 | 5.65834  | 6.843404 | 0.005438 |
| IFFO1        | 1.467949 | 7.10727  | 6.831464 | 0.005467 |
| EDN2         | 1.577314 | 7.555684 | 6.828885 | 0.005473 |
| AW975183     | 1.901541 | 5.378606 | 6.79399  | 0.005557 |
| CCDC28B      | 1.213243 | 5.846549 | 6.792195 | 0.005562 |
| LCN2         | 1.491422 | 8.130379 | 6.789191 | 0.005569 |
| TCEAL3       | 1.270532 | 9.933686 | 6.783641 | 0.005583 |
| FIRRE        | 1.618487 | 6.282631 | 6.772406 | 0.005611 |
| R43301       | 2.019649 | 5.577604 | 6.762988 | 0.005634 |
| HBEGF        | 1.213256 | 7.16375  | 6.758678 | 0.005645 |
| ARHGDIB      | 1.478313 | 7.073061 | 6.75695  | 0.005649 |
| LOC221814    | 1.672335 | 7.206019 | 6.739907 | 0.005692 |
| FLJ34503     | -1.86935 | 1.276607 | -6.73336 | 0.005708 |
| AA772874     | 2.158794 | 6.429565 | 6.732199 | 0.005711 |
| ATP8B5P      | 2.288452 | 3.995016 | 6.726561 | 0.005726 |
| ZNF442       | -1.79588 | 2.653102 | -6.70579 | 0.005779 |
| GBP3         | 1.336068 | 7.249166 | 6.676137 | 0.005856 |
| PC           | -1.25234 | 8.570118 | -6.67302 | 0.005864 |
| AI808327     | 2.644111 | 6.532035 | 6.635244 | 0.005964 |
| AU144328     | 2.258497 | 5.956341 | 6.633309 | 0.005969 |
| AF070565     | 3.329534 | 4.301294 | 6.627363 | 0.005985 |
| LINC00973    | 1.229471 | 9.336708 | 6.619035 | 0.006008 |
| AL833286     | 1.77835  | 4.266038 | 6.615214 | 0.006018 |
| TMCC3        | 1.842393 | 5.740688 | 6.584206 | 0.006103 |
| DEFB124      | -1.2759  | 6.721972 | -6.57047 | 0.006141 |
| C1QTNF1-AS1  | 1.941938 | 5.683892 | 6.567035 | 0.00615  |
| AI222295     | -1.67917 | 5.132979 | -6.56422 | 0.006158 |
| LINC01023    | 2.539913 | 5.546495 | 6.555624 | 0.006182 |
| AW590666     | 1.379485 | 1.213185 | 6.549056 | 0.006201 |
| LINC01341    | 1.475499 | 4.1642   | 6.544829 | 0.006213 |
| VANGL2       | 1.209348 | 8.160189 | 6.539321 | 0.006228 |
| PDGFRA       | 1.304551 | 4.87913  | 6.530604 | 0.006253 |
| AI652154     | -1.69863 | 2.51709  | -6.51999 | 0.006284 |



Table SI. Continued.

| Gene         | logFC    | AveExpr  | t value  | P-value  |
|--------------|----------|----------|----------|----------|
| AW137804     | -2.91444 | 5.541157 | -6.50457 | 0.006328 |
| LOC101927723 | 1.798409 | 4.511511 | 6.500453 | 0.00634  |
| DGKB         | 1.639647 | 4.025797 | 6.46576  | 0.006442 |
| ZFP3         | 1.212295 | 7.351605 | 6.460649 | 0.006457 |
| LOC101928098 | 2.5884   | 5.48037  | 6.459935 | 0.006459 |
| BE675275     | -1.50956 | 4.9433   | -6.44926 | 0.006491 |
| AU158871     | 2.455573 | 5.750886 | 6.438515 | 0.006523 |
| LOC728730    | 1.806382 | 6.07956  | 6.438246 | 0.006524 |
| BNC1         | 2.351088 | 4.242971 | 6.43088  | 0.006546 |
| BC012881     | -1.91431 | 4.727711 | -6.42628 | 0.00656  |
| PKD2L1       | 2.166117 | 6.74516  | 6.400766 | 0.006638 |
| LOC101928954 | 2.601896 | 6.534474 | 6.390472 | 0.00667  |
| LOC100127886 | -3.67932 | 2.722844 | -6.38515 | 0.006686 |
| AA434097     | 1.910742 | 5.021273 | 6.376404 | 0.006714 |
| ZP1          | 2.219053 | 5.673366 | 6.338865 | 0.006832 |
| AL713719     | -2.15018 | 2.996642 | -6.33223 | 0.006854 |
| AL041381     | 3.549861 | 3.77517  | 6.297052 | 0.006968 |
| LOC100288181 | -1.50576 | 3.624784 | -6.2938  | 0.006978 |
| BF223066     | 3.132584 | 4.305962 | 6.292857 | 0.006982 |
| ZNF674-AS1   | 1.21277  | 7.246549 | 6.28278  | 0.007015 |
| H17981       | -1.79264 | 4.951904 | -6.28049 | 0.007022 |
| BF439240     | -2.4084  | 3.108252 | -6.26944 | 0.007059 |
| AW451455     | -2.52453 | 4.80272  | -6.25845 | 0.007096 |
| PTPRCAP      | 1.88074  | 4.018579 | 6.25499  | 0.007108 |
| LOC102724975 | -1.79654 | 3.464742 | -6.24781 | 0.007132 |
| PCDHB18P     | -1.53356 | 5.126369 | -6.24341 | 0.007147 |
| AI671540     | -2.09397 | 3.782622 | -6.24115 | 0.007154 |
| AI417595     | -2.98383 | 3.391523 | -6.24025 | 0.007157 |
| ADGRF2       | -1.42048 | 4.717972 | -6.23634 | 0.007171 |
| R49603       | 1.265339 | 7.937432 | 6.231272 | 0.007188 |
| SUGT1P1      | 1.349974 | 6.956812 | 6.220087 | 0.007226 |
| MICALL2      | 1.274949 | 7.060266 | 6.206639 | 0.007273 |
| CDNF         | 1.307338 | 5.67797  | 6.203019 | 0.007285 |
| LOC101927653 | 1.247058 | 7.19837  | 6.190808 | 0.007328 |
| GPC6         | -1.73167 | 6.815989 | -6.18851 | 0.007336 |
| CLIC3        | 3.444558 | 6.209909 | 6.187718 | 0.007339 |
| VN1R4        | 2.283736 | 4.968408 | 6.187417 | 0.00734  |
| AF086074     | 2.6723   | 5.070698 | 6.186758 | 0.007342 |
| AA252240     | -1.916   | 4.261098 | -6.18502 | 0.007348 |
| AK024962     | -1.96166 | 4.050181 | -6.17121 | 0.007397 |
| AF339809     | 1.606781 | 5.737236 | 6.157378 | 0.007446 |
| MRAP2        | 1.333953 | 7.692511 | 6.151491 | 0.007467 |
| AW292996     | -3.30968 | 5.123163 | -6.14343 | 0.007496 |
| ANKRA2       | 1.210464 | 9.732872 | 6.121453 | 0.007576 |
| CACNA2D3     | -1.52875 | 4.119818 | -6.11509 | 0.007599 |
| BC041911     | 2.477584 | 2.906313 | 6.106209 | 0.007632 |
| RPRML        | -2.13277 | 4.863404 | -6.09421 | 0.007677 |
| CPTP         | 1.267394 | 7.165563 | 6.093315 | 0.00768  |
| C1orf210     | 2.55764  | 4.259286 | 6.078989 | 0.007733 |
| TMEM155      | 1.787739 | 5.229721 | 6.076925 | 0.007741 |
| LINC00690    | -1.41934 | 3.881433 | -6.06778 | 0.007776 |
| PID1         | 1.499862 | 5.30763  | 6.066943 | 0.007779 |
| ACSBG1       | 1.573442 | 5.185175 | 6.056407 | 0.007819 |
| LOC728024    | 3.094419 | 4.99491  | 6.047429 | 0.007853 |
| PSORS1C1     | -1.29494 | 4.953327 | -6.03895 | 0.007886 |
| AI253193     | 2.090519 | 6.007102 | 6.028132 | 0.007928 |

Table SI. Continued.

| Gene           | logFC    | AveExpr  | t value  | P-value  |
|----------------|----------|----------|----------|----------|
| UGT2A2         | 2.47578  | 5.368544 | 6.023004 | 0.007947 |
| FAT2           | 1.855385 | 6.126397 | 6.014963 | 0.007979 |
| X72882         | -1.32708 | 5.63599  | -5.99229 | 0.008068 |
| AA504346       | -2.84854 | 3.014395 | -5.98198 | 0.008109 |
| BC031290       | 1.584837 | 7.402957 | 5.970921 | 0.008153 |
| AU145390       | 4.824469 | 3.24756  | 5.958299 | 0.008204 |
| WDR63          | 3.462636 | 5.433452 | 5.953098 | 0.008226 |
| BC024311       | 1.939337 | 3.773262 | 5.933339 | 0.008306 |
| ARHGAP36       | -1.34298 | 5.144263 | -5.90189 | 0.008437 |
| FAM26D         | -1.27067 | 6.371482 | -5.87054 | 0.00857  |
| AW138673       | -1.85174 | 5.059526 | -5.86855 | 0.008579 |
| LINC01545      | 1.739552 | 6.111804 | 5.84367  | 0.008687 |
| BC033846       | 2.204219 | 6.306445 | 5.843658 | 0.008687 |
| SLC32A1        | 1.790762 | 5.590338 | 5.841129 | 0.008698 |
| AU157313       | 1.814767 | 6.279508 | 5.840338 | 0.008701 |
| IGF2BP2-AS1    | 1.560065 | 5.585191 | 5.837147 | 0.008715 |
| F3             | 2.459754 | 6.642379 | 5.836651 | 0.008717 |
| AI362687       | 1.224573 | 5.473564 | 5.835821 | 0.008721 |
| AI492860       | 3.853321 | 2.595565 | 5.83379  | 0.00873  |
| LOC142937      | -1.66308 | 4.374623 | -5.81607 | 0.008808 |
| BI603681       | -1.43096 | 3.108335 | -5.81593 | 0.008809 |
| ZNF540         | 1.273609 | 6.654225 | 5.772931 | 0.009003 |
| ATP6V0E2-AS1   | 1.679468 | 5.53322  | 5.772249 | 0.009006 |
| WFDC11         | -1.67736 | 4.994103 | -5.77019 | 0.009015 |
| AW129128       | 2.724665 | 5.742361 | 5.760751 | 0.009059 |
| ARHGAP26-AS1   | 2.238135 | 4.800658 | 5.758041 | 0.009071 |
| AL707919       | 1.462646 | 6.481351 | 5.753824 | 0.009091 |
| MAMDC2-AS1     | -1.79579 | 5.607357 | -5.75256 | 0.009097 |
| ACHE           | -1.47268 | 4.83057  | -5.7488  | 0.009114 |
| CCDC169-SOHLH2 | 1.2646   | 5.288965 | 5.743467 | 0.009139 |
| AI433880       | 1.519941 | 6.232509 | 5.734509 | 0.009181 |
| LINC00556      | -1.42062 | 4.781631 | -5.72503 | 0.009225 |
| BC041381       | -1.8052  | 4.32976  | -5.71741 | 0.009261 |
| AI969945       | 2.351263 | 4.310569 | 5.708613 | 0.009303 |
| AL589610       | 1.871911 | 4.651908 | 5.693276 | 0.009377 |
| TMEM139        | 1.291721 | 6.984345 | 5.676675 | 0.009457 |
| AF086437       | -1.59043 | 3.059733 | -5.67292 | 0.009476 |
| SLC16A11       | 1.376424 | 6.038679 | 5.653296 | 0.009572 |
| RNF128         | 2.132654 | 5.118191 | 5.649654 | 0.00959  |
| CHST8          | 1.201014 | 6.633498 | 5.647852 | 0.009599 |
| AL157491       | -1.20392 | 6.378966 | -5.64438 | 0.009616 |
| R39803         | 1.464789 | 2.996639 | 5.627203 | 0.009702 |
| AA929011       | 1.810537 | 6.236334 | 5.614703 | 0.009766 |
| DPY19L2P3      | 1.701295 | 3.142659 | 5.601635 | 0.009832 |
| H15900         | -1.72911 | 4.352997 | -5.60086 | 0.009836 |
| LOC100129198   | -1.34145 | 5.457071 | -5.58493 | 0.009918 |
| LINC01585      | -1.82623 | 4.290354 | -5.58173 | 0.009935 |
| BC022568       | 1.776542 | 5.589808 | 5.58125  | 0.009937 |
| AKAP5          | 2.614908 | 5.163734 | 5.5806   | 0.009941 |
| POMT1          | 1.308702 | 7.276921 | 5.580052 | 0.009944 |
| AF086424       | 3.120731 | 3.914293 | 5.579453 | 0.009947 |
| ZNF549         | -2.2785  | 4.59992  | -5.57797 | 0.009954 |
| AA121271       | 1.684589 | 5.508544 | 5.573655 | 0.009977 |
| OTX2-AS1       | -1.34631 | 3.781761 | -5.57051 | 0.009993 |
| AV751094       | -3.0273  | 3.248589 | -5.56197 | 0.010038 |
| LOC284263      | -2.52729 | 4.067815 | -5.55847 | 0.010057 |

Table SI. Continued.

| Gene         | logFC    | AveExpr  | t value  | P-value  |
|--------------|----------|----------|----------|----------|
| T79639       | -2.99859 | 4.6889   | -5.55248 | 0.010088 |
| SCNN1B       | -2.08954 | 4.569702 | -5.54294 | 0.010139 |
| CYTIP        | 1.348755 | 5.599854 | 5.538405 | 0.010163 |
| FER1L5       | 3.12264  | 4.369968 | 5.53395  | 0.010187 |
| WFDC1        | -2.1849  | 4.51705  | -5.52781 | 0.01022  |
| IL1RL2       | -2.86531 | 4.352495 | -5.52499 | 0.010235 |
| LINC00029    | -1.62431 | 5.080528 | -5.51335 | 0.010298 |
| TNFRSF10C    | 1.323428 | 6.725724 | 5.508854 | 0.010323 |
| PRO1082      | 1.489656 | 5.124007 | 5.506656 | 0.010335 |
| BF515734     | -1.76823 | 5.124759 | -5.5035  | 0.010352 |
| WFDC10B      | -2.03114 | 4.65411  | -5.50001 | 0.010371 |
| BC021164     | 2.137956 | 6.583906 | 5.486245 | 0.010447 |
| AW205208     | 1.766613 | 3.217905 | 5.484104 | 0.010459 |
| SMYD1        | 1.522147 | 6.244097 | 5.478097 | 0.010493 |
| J02963       | 1.536862 | 6.232823 | 5.477965 | 0.010493 |
| AA837131     | 1.944329 | 5.043571 | 5.473672 | 0.010517 |
| ZNF547       | 1.62024  | 6.153872 | 5.456489 | 0.010614 |
| NELL2        | 1.657986 | 7.124165 | 5.456046 | 0.010616 |
| AI792698     | 1.483848 | 4.851115 | 5.452091 | 0.010639 |
| AFMID        | 1.33321  | 4.1327   | 5.443078 | 0.01069  |
| SNAI3        | 1.359942 | 6.043903 | 5.42772  | 0.010778 |
| LOC101929115 | -1.34817 | 4.708242 | -5.42487 | 0.010795 |
| PPFIA2       | 1.428664 | 4.414347 | 5.409538 | 0.010884 |
| TXK          | 1.91834  | 5.028483 | 5.405708 | 0.010906 |
| LOC101928475 | 1.602149 | 5.708311 | 5.393984 | 0.010975 |
| NAG18        | 1.898019 | 3.598411 | 5.392098 | 0.010986 |
| AL137292     | 1.937174 | 4.972932 | 5.391521 | 0.01099  |
| R39960       | -1.34403 | 2.557345 | -5.38138 | 0.01105  |
| AK024800     | -2.28273 | 5.440766 | -5.37797 | 0.01107  |
| AW511032     | 3.021407 | 5.214852 | 5.376248 | 0.011081 |
| UNC13A       | 1.402789 | 5.977872 | 5.374646 | 0.01109  |
| SERPINA6     | -1.68795 | 5.142289 | -5.37233 | 0.011104 |
| CH25H        | 1.495708 | 6.46068  | 5.357775 | 0.011192 |
| LY96         | 1.319007 | 6.273197 | 5.350995 | 0.011233 |
| BC043227     | 1.548893 | 3.243607 | 5.3225   | 0.011408 |
| ZNF528       | 2.371738 | 6.333575 | 5.313521 | 0.011464 |
| BF511336     | 1.954356 | 5.851983 | 5.30467  | 0.011519 |
| AW139789     | -2.6685  | 5.548271 | -5.29318 | 0.011592 |
| SPTLC3       | 1.40564  | 4.943576 | 5.289596 | 0.011615 |
| BF061976     | -1.81529 | 4.366032 | -5.28447 | 0.011647 |
| W96140       | 2.20876  | 5.173619 | 5.280926 | 0.01167  |
| KBTBD3       | -1.26753 | 7.109223 | -5.28022 | 0.011675 |
| SCRG1        | 1.278351 | 6.510529 | 5.278701 | 0.011684 |
| CLIC1P1      | -3.78861 | 4.095493 | -5.27345 | 0.011718 |
| UMODL1-AS1   | 1.944935 | 6.075393 | 5.258533 | 0.011814 |
| AL831888     | -1.20871 | 5.444626 | -5.25773 | 0.011819 |
| NARFL        | -1.23456 | 6.969749 | -5.25747 | 0.011821 |
| AW271460     | -1.38665 | 5.858488 | -5.25582 | 0.011832 |
| AXDND1       | 1.595868 | 4.742457 | 5.25418  | 0.011843 |
| LOC101929384 | 2.339638 | 4.999478 | 5.23869  | 0.011944 |
| BF725688     | -1.26889 | 6.127758 | -5.22332 | 0.012046 |
| PRSS37       | -1.59946 | 4.985787 | -5.21729 | 0.012086 |
| AI740774     | -2.57851 | 4.485158 | -5.20831 | 0.012146 |
| IL24         | 1.56704  | 4.975823 | 5.197819 | 0.012217 |
| CPB1         | -1.22    | 6.825124 | -5.1905  | 0.012267 |
| FAM221B      | 1.686502 | 3.652832 | 5.189073 | 0.012277 |

Table SI. Continued.

| Gene         | logFC    | AveExpr  | t value  | P-value  |
|--------------|----------|----------|----------|----------|
| AZU1         | 2.552685 | 5.416313 | 5.186393 | 0.012295 |
| AI093572     | 1.217138 | 6.45082  | 5.180268 | 0.012337 |
| ASIC2        | 1.404617 | 6.382678 | 5.179938 | 0.012339 |
| ZKSCAN7      | 2.298051 | 4.717495 | 5.165222 | 0.012441 |
| BC021677     | 1.405943 | 5.486677 | 5.152291 | 0.012531 |
| NR1I2        | 1.432915 | 6.737899 | 5.145878 | 0.012576 |
| HIST1H1A     | 2.641374 | 4.41451  | 5.142245 | 0.012602 |
| LINC01555    | -2.42629 | 3.898341 | -5.13652 | 0.012642 |
| AK025763     | 1.457115 | 5.446545 | 5.135519 | 0.012649 |
| LOC101928123 | 1.78965  | 5.053112 | 5.132344 | 0.012672 |
| AF113688     | -1.28431 | 4.686414 | -5.12948 | 0.012692 |
| LOC101927379 | -1.25641 | 3.917218 | -5.12111 | 0.012752 |
| CDY1         | -3.50884 | 2.087864 | -5.10457 | 0.012871 |
| AMELY        | -2.68367 | 3.534291 | -5.10246 | 0.012887 |
| LOC101928741 | -1.30056 | 5.052965 | -5.09644 | 0.012931 |
| BF588945     | 1.429252 | 5.900299 | 5.082182 | 0.013035 |
| AL353939     | 1.942973 | 6.644441 | 5.069458 | 0.013129 |
| LTC4S        | -1.42456 | 2.756186 | -5.05595 | 0.01323  |
| GDPD3        | 1.982323 | 6.930805 | 5.025301 | 0.013463 |
| TFAP2D       | -1.85308 | 5.586916 | -5.00973 | 0.013584 |
| AW117264     | -1.91001 | 1.920055 | -5.00897 | 0.01359  |
| ADRA2A       | 1.367772 | 6.221643 | 5.00278  | 0.013638 |
| CCDC121      | -1.30877 | 6.743665 | -4.99492 | 0.013699 |
| SNCG         | 1.760457 | 6.383121 | 4.992884 | 0.013715 |
| C3orf62      | 2.085957 | 6.061821 | 4.986291 | 0.013767 |
| LOC100268168 | 1.23084  | 7.10591  | 4.980982 | 0.01381  |
| CEACAM8      | -2.74285 | 3.413287 | -4.98074 | 0.013812 |
| R46483       | -2.63231 | 2.3903   | -4.98026 | 0.013815 |
| AF085988     | 2.784315 | 5.893874 | 4.978785 | 0.013827 |
| BF195312     | 2.355603 | 5.992855 | 4.97833  | 0.013831 |
| TDGF1P3      | -1.47595 | 4.278344 | -4.97458 | 0.013861 |
| AW872344     | -1.21375 | 2.46725  | -4.96985 | 0.013898 |
| AA932692     | 1.920253 | 5.889382 | 4.96953  | 0.013901 |
| AW629036     | -1.30335 | 3.490819 | -4.95722 | 0.014    |
| ZCCHC13      | 2.679932 | 4.92569  | 4.953133 | 0.014033 |
| AW002073     | -2.13506 | 4.275443 | -4.94482 | 0.014101 |
| CREB3L3      | 1.417834 | 2.179865 | 4.938629 | 0.014151 |
| GUCY1B2      | -1.34122 | 3.597255 | -4.93818 | 0.014155 |
| LOC105374676 | 3.170402 | 5.241447 | 4.929035 | 0.01423  |
| AI056998     | -1.32893 | 5.719077 | -4.92678 | 0.014249 |
| AI653013     | 1.909177 | 4.377171 | 4.923267 | 0.014278 |
| T90013       | -2.57992 | 5.875994 | -4.9214  | 0.014293 |
| AK025190     | 1.366036 | 7.793375 | 4.920428 | 0.014301 |
| AL137427     | 1.470679 | 1.922254 | 4.919488 | 0.014309 |
| BMP3         | 1.77627  | 4.981335 | 4.918819 | 0.014315 |
| GRAMD1C      | 3.136663 | 4.640061 | 4.914888 | 0.014348 |
| LOC728093    | -1.32482 | 8.49294  | -4.9134  | 0.01436  |
| IL10RB-AS1   | -1.29169 | 3.922965 | -4.9067  | 0.014416 |
| LRRN1        | -2.0307  | 2.96701  | -4.8947  | 0.014517 |
| AW573261     | 1.22786  | 4.785596 | 4.883244 | 0.014615 |
| TLR10        | 2.383053 | 5.684988 | 4.879432 | 0.014647 |
| AW590925     | 2.214749 | 5.412876 | 4.865616 | 0.014766 |
| AI690081     | 1.986569 | 4.377821 | 4.862404 | 0.014794 |
| CSRNP3       | -1.55094 | 5.424992 | -4.84859 | 0.014914 |
| SCN1A        | 1.436577 | 5.114791 | 4.837983 | 0.015008 |
| AK025086     | -1.25793 | 5.85476  | -4.83246 | 0.015057 |

Table SI. Continued.

| Gene         | logFC    | AveExpr  | t value  | P-value  |
|--------------|----------|----------|----------|----------|
| AL109783     | 1.276345 | 6.053541 | 4.830041 | 0.015078 |
| TRAV12-2     | 2.754613 | 5.631971 | 4.81586  | 0.015205 |
| AV700086     | 3.081182 | 3.998098 | 4.814635 | 0.015216 |
| LIMD2        | 2.543277 | 5.324584 | 4.814573 | 0.015217 |
| BF436080     | -1.7957  | 4.31019  | -4.80984 | 0.015259 |
| AA159799     | 2.256713 | 4.133469 | 4.804197 | 0.01531  |
| ADGRB3       | 2.125348 | 4.400197 | 4.803143 | 0.01532  |
| AA777534     | 3.391764 | 3.974431 | 4.80062  | 0.015343 |
| NOMO3        | -1.75125 | 4.846322 | -4.79554 | 0.015389 |
| BC028185     | -3.33839 | 2.622545 | -4.78035 | 0.015528 |
| BG704082     | -1.20978 | 5.493099 | -4.76903 | 0.015633 |
| CDY1B        | 1.362133 | 6.788342 | 4.768338 | 0.01564  |
| SEC14L3      | 1.618425 | 5.137478 | 4.764668 | 0.015674 |
| BC006563     | -1.87077 | 4.103501 | -4.7594  | 0.015723 |
| FAM13C       | 2.296266 | 4.045512 | 4.757942 | 0.015737 |
| CTNNA2       | -1.78425 | 4.039601 | -4.75672 | 0.015749 |
| KIAA0895L    | 1.834198 | 6.078282 | 4.755555 | 0.01576  |
| LOC400590    | -3.08471 | 1.039814 | -4.75461 | 0.015768 |
| KRTAP11-1    | 1.576505 | 7.342305 | 4.739664 | 0.01591  |
| LOC645485    | 1.548654 | 4.911185 | 4.739577 | 0.015911 |
| H24473       | 2.559675 | 1.125597 | 4.731013 | 0.015993 |
| MOP-1        | 1.905777 | 1.587489 | 4.723201 | 0.016068 |
| HOXA-AS3     | 1.640606 | 5.592485 | 4.717391 | 0.016124 |
| AI285865     | 1.725614 | 5.087763 | 4.704175 | 0.016253 |
| FIGLA        | -2.34961 | 3.829819 | -4.69294 | 0.016363 |
| PDE2A        | 1.465737 | 6.764144 | 4.692764 | 0.016365 |
| PLEKHA6      | 1.341692 | 7.641478 | 4.686227 | 0.01643  |
| BG288330     | -1.34461 | 9.525943 | -4.68502 | 0.016442 |
| AI655447     | 1.583843 | 5.746751 | 4.680006 | 0.016492 |
| LOC100631378 | 1.577707 | 4.804069 | 4.679696 | 0.016495 |
| INSL5        | 2.245125 | 5.141707 | 4.671545 | 0.016576 |
| ULBP2        | 1.256194 | 7.915251 | 4.660761 | 0.016685 |
| WDR25        | 2.217309 | 5.327985 | 4.644799 | 0.016848 |
| AU146886     | -1.44084 | 4.467922 | -4.64024 | 0.016894 |
| AI523245     | 2.8233   | 3.520772 | 4.636521 | 0.016933 |
| AW663580     | -2.28524 | 4.235932 | -4.62429 | 0.01706  |
| SLC26A7      | 1.276939 | 5.136673 | 4.622976 | 0.017073 |
| T89089       | 3.701479 | 2.167761 | 4.621509 | 0.017089 |
| AA001941     | 2.512369 | 4.852522 | 4.604299 | 0.017269 |
| AW004885     | -1.70908 | 4.484742 | -4.60187 | 0.017295 |
| BE327079     | -2.33044 | 3.199755 | -4.59802 | 0.017336 |
| SUN3         | 1.826666 | 3.168501 | 4.588082 | 0.017442 |
| ZNF793-AS1   | -1.53863 | 3.952918 | -4.57854 | 0.017545 |
| MYH13        | 1.513666 | 5.638854 | 4.571051 | 0.017626 |
| BU740192     | 1.328328 | 2.680655 | 4.560505 | 0.017741 |
| LOC101929974 | 1.481928 | 1.773271 | 4.560297 | 0.017743 |
| ARL14        | 1.703143 | 5.61222  | 4.555721 | 0.017793 |
| AA833813     | -1.39265 | 4.749295 | -4.54297 | 0.017934 |
| AV649718     | 1.940802 | 3.751431 | 4.536248 | 0.018009 |
| AI791152     | 2.568982 | 4.917779 | 4.535271 | 0.01802  |
| L33988       | -1.48612 | 5.695863 | -4.53422 | 0.018032 |
| LOC101927085 | 1.443436 | 5.772993 | 4.486428 | 0.018577 |
| TOP1P2       | -1.63686 | 4.372274 | -4.48513 | 0.018592 |
| DBIL5P2      | -2.25892 | 5.116857 | -4.48388 | 0.018606 |
| LOC554207    | 2.749936 | 5.236518 | 4.483401 | 0.018612 |
| PPM1E        | 1.489798 | 6.05051  | 4.479728 | 0.018655 |

Table SI. Continued.

| Gene         | logFC    | AveExpr  | t value  | P-value  |
|--------------|----------|----------|----------|----------|
| KLRC4-KLRK1  | -1.31284 | 5.822372 | -4.47331 | 0.01873  |
| ZFP42        | 1.49406  | 5.447202 | 4.470799 | 0.018759 |
| LOC440173    | 1.958086 | 4.770576 | 4.463411 | 0.018846 |
| LOC101928225 | -2.9395  | 3.419817 | -4.4561  | 0.018933 |
| R3HDML       | -1.78267 | 6.237152 | -4.45511 | 0.018945 |
| MAGI2-AS2    | 1.698489 | 5.287023 | 4.452607 | 0.018975 |
| CCDC167      | -1.2705  | 9.230164 | -4.44631 | 0.01905  |
| FGF6         | 1.675796 | 7.272686 | 4.442745 | 0.019093 |
| AV651668     | 2.069569 | 3.566734 | 4.432228 | 0.01922  |
| RGS13        | 2.984789 | 2.223357 | 4.43113  | 0.019234 |
| ITGAD        | -1.95069 | 6.487099 | -4.42953 | 0.019253 |
| LINC00276    | -1.7179  | 1.414434 | -4.42441 | 0.019315 |
| AL832894     | 1.861539 | 6.524641 | 4.42198  | 0.019345 |
| W22152       | 1.396655 | 6.751207 | 4.407269 | 0.019526 |
| DENND2A      | 1.457492 | 5.089141 | 4.405486 | 0.019548 |
| DGKI         | 1.8573   | 5.29571  | 4.397362 | 0.019649 |
| AF116621     | -1.68005 | 6.589029 | -4.37851 | 0.019886 |
| BF223214     | 2.749778 | 3.607057 | 4.375112 | 0.01993  |
| FABP2        | 2.155144 | 5.425296 | 4.36744  | 0.020027 |
| AU146874     | 1.604977 | 4.919991 | 4.36626  | 0.020042 |
| AW205775     | 1.392756 | 4.379024 | 4.360036 | 0.020122 |
| AV738999     | 2.349963 | 5.148639 | 4.338689 | 0.020399 |
| BC021902     | -1.7465  | 4.867287 | -4.33634 | 0.02043  |
| RRN3P3       | 1.927492 | 5.929095 | 4.329462 | 0.020521 |
| LOC101927752 | -1.33062 | 7.527589 | -4.32653 | 0.020559 |
| CCL8         | 1.997    | 6.071172 | 4.322334 | 0.020615 |
| AA626334     | -2.28514 | 3.20913  | -4.31984 | 0.020648 |
| AI612095     | 1.426524 | 4.679246 | 4.319355 | 0.020655 |
| ZNF624       | -1.31927 | 6.822555 | -4.31914 | 0.020657 |
| AU147518     | -2.4543  | 5.369342 | -4.31397 | 0.020726 |
| AU147125     | 1.342156 | 5.262879 | 4.301999 | 0.020887 |
| BF732649     | -1.21363 | 2.951032 | -4.28259 | 0.021151 |
| H63394       | -2.06404 | 5.370694 | -4.28258 | 0.021151 |
| SOAT2        | -1.70329 | 5.246385 | -4.28037 | 0.021182 |
| BC040916     | 1.720321 | 3.046229 | 4.276577 | 0.021234 |
| SLC30A10     | 1.432702 | 5.175506 | 4.266671 | 0.021371 |
| AU146468     | 1.257448 | 4.906065 | 4.257968 | 0.021492 |
| AK021739     | -1.84581 | 5.157548 | -4.25085 | 0.021592 |
| AI962352     | -1.25307 | 3.638809 | -4.24842 | 0.021627 |
| F2           | -1.38458 | 5.601696 | -4.24524 | 0.021672 |
| ENPP6        | 3.776847 | 3.093465 | 4.24511  | 0.021673 |
| LOC102724718 | 2.567288 | 4.441497 | 4.244486 | 0.021682 |
| AW445012     | 1.475648 | 4.005838 | 4.243799 | 0.021692 |
| U05589       | -1.68857 | 3.970159 | -4.23961 | 0.021751 |
| LOC100509457 | -1.22876 | 4.446738 | -4.23857 | 0.021766 |
| AA831943     | 2.441994 | 5.335244 | 4.235449 | 0.021811 |
| GPR3         | 1.299979 | 6.140825 | 4.228899 | 0.021904 |
| AI492298     | 2.540718 | 3.144304 | 4.212307 | 0.022144 |
| DACT1        | -2.47318 | 3.532475 | -4.21222 | 0.022145 |
| KCNQ4        | 1.359261 | 5.153078 | 4.209841 | 0.02218  |
| IQCF6        | -1.31541 | 2.986551 | -4.20592 | 0.022237 |
| AA701259     | -1.48959 | 5.656431 | -4.19985 | 0.022326 |
| LOC102723684 | 2.633454 | 4.410212 | 4.197235 | 0.022364 |
| PDCD4-AS1    | 1.351455 | 6.966271 | 4.194702 | 0.022402 |
| AK022362     | -1.26676 | 4.417615 | -4.19411 | 0.02241  |
| ZNF32-AS3    | 1.32489  | 4.10894  | 4.187569 | 0.022507 |



Table SI. Continued.

| Gene         | logFC    | AveExpr  | t value  | P-value  |
|--------------|----------|----------|----------|----------|
| CRISP2       | -2.07103 | 3.603353 | -4.18641 | 0.022524 |
| AW451696     | -1.68858 | 4.591631 | -4.15634 | 0.022977 |
| BF510392     | -2.58295 | 4.672172 | -4.15161 | 0.023049 |
| BC037824     | 2.170032 | 5.169256 | 4.13823  | 0.023255 |
| SEMG1        | 1.741037 | 2.714356 | 4.131482 | 0.02336  |
| SUSD3        | -1.25691 | 4.544242 | -4.12905 | 0.023398 |
| AA828246     | -2.6239  | 4.13731  | -4.12792 | 0.023415 |
| MDGA2        | 1.778289 | 4.554186 | 4.11444  | 0.023627 |
| ITPR1-AS1    | 2.290167 | 2.475619 | 4.110371 | 0.023691 |
| IL36RN       | -1.255   | 5.993883 | -4.1077  | 0.023734 |
| ACTL8        | 2.051174 | 5.967103 | 4.104998 | 0.023777 |
| AI734054     | 1.935376 | 4.871925 | 4.104601 | 0.023783 |
| CCL2         | 1.460483 | 7.662398 | 4.096304 | 0.023916 |
| ACOT6        | -1.34803 | 3.542303 | -4.09001 | 0.024017 |
| BF194816     | -2.24285 | 4.730088 | -4.08867 | 0.024038 |
| LOC101929148 | -1.54297 | 4.121086 | -4.08788 | 0.024051 |
| BF681305     | -3.41211 | 2.736653 | -4.08597 | 0.024082 |
| LOC101929988 | 2.215203 | 6.207275 | 4.083876 | 0.024116 |
| BC042964     | 2.477191 | 1.453052 | 4.083806 | 0.024117 |
| BC019583     | 1.730403 | 4.201192 | 4.081233 | 0.024159 |
| AF113675     | -1.39484 | 6.103693 | -4.07919 | 0.024192 |
| LOC105371352 | 1.670621 | 4.364086 | 4.078796 | 0.024199 |
| AI217900     | 1.245957 | 5.812219 | 4.078285 | 0.024207 |
| LOC339874    | 2.212943 | 6.189589 | 4.064745 | 0.024429 |
| LINC01492    | 2.393727 | 3.561639 | 4.055183 | 0.024587 |
| GCKR         | 1.378458 | 5.744422 | 4.039014 | 0.024857 |
| AI936450     | 3.510735 | 3.703385 | 4.038813 | 0.024861 |
| HAS1         | 1.220179 | 5.342159 | 4.032302 | 0.024971 |
| BG054792     | -1.84762 | 4.621685 | -4.02889 | 0.025029 |
| AI017888     | 1.389058 | 5.559    | 4.024979 | 0.025095 |
| BC034639     | -2.26054 | 3.141064 | -4.00944 | 0.025362 |
| CYP2C8       | -1.84507 | 4.376472 | -3.99834 | 0.025555 |
| C1orf158     | 1.334191 | 5.35285  | 3.991138 | 0.025681 |
| SELL         | 1.326248 | 6.533814 | 3.989303 | 0.025713 |
| BC022423     | 1.484087 | 5.337951 | 3.988971 | 0.025719 |
| IFITM3       | 2.439846 | 7.78373  | 3.980142 | 0.025875 |
| MAGEA11      | -1.55189 | 3.265616 | -3.9784  | 0.025906 |
| H55978       | -1.52077 | 3.517485 | -3.9626  | 0.026188 |
| AI990286     | 1.990432 | 6.616459 | 3.948667 | 0.02644  |
| NBEAP1       | 1.264688 | 3.630628 | 3.929013 | 0.026802 |
| LINC00691    | 2.455252 | 4.126095 | 3.925262 | 0.026871 |
| DLL1         | -1.38181 | 4.799131 | -3.92025 | 0.026965 |
| AI459554     | -2.03203 | 4.486769 | -3.91023 | 0.027153 |
| CCL27        | -1.2492  | 5.297361 | -3.90552 | 0.027242 |
| H68862       | -1.27268 | 5.61382  | -3.89653 | 0.027412 |
| FMO9P        | 1.982209 | 3.012336 | 3.894921 | 0.027443 |
| LOC102724611 | -2.14531 | 2.900811 | -3.89117 | 0.027515 |
| SPATA1       | 1.263137 | 3.337475 | 3.886265 | 0.027609 |
| AK094642     | -1.44446 | 3.287371 | -3.88287 | 0.027675 |
| BF508641     | 3.664204 | 4.500038 | 3.871799 | 0.027889 |
| LOC100130232 | 1.32383  | 3.931195 | 3.867596 | 0.027971 |
| AK024132     | -1.44367 | 4.31358  | -3.86645 | 0.027994 |
| AA999783     | -1.49547 | 4.065099 | -3.85592 | 0.028201 |
| AF086350     | 3.07399  | 4.755185 | 3.852205 | 0.028275 |
| AI082004     | -1.27168 | 8.834594 | -3.85193 | 0.02828  |
| LINC01364    | -1.27272 | 5.462386 | -3.85096 | 0.028299 |

Table SI. Continued.

| Gene         | logFC    | AveExpr  | t value  | P-value  |
|--------------|----------|----------|----------|----------|
| AK023895     | -1.35945 | 5.03695  | -3.84808 | 0.028356 |
| LOC150051    | 1.335284 | 6.520855 | 3.83591  | 0.0286   |
| MIR6875      | 1.404793 | 5.861213 | 3.835124 | 0.028616 |
| CDA          | 2.227189 | 7.235481 | 3.8319   | 0.028681 |
| BC015194     | -1.46141 | 2.896917 | -3.83188 | 0.028681 |
| GRIA2        | -1.2339  | 3.191037 | -3.83058 | 0.028708 |
| FAM46C       | 1.267822 | 6.203953 | 3.826846 | 0.028783 |
| RAD21L1      | 3.460946 | 2.834131 | 3.818658 | 0.02895  |
| AI991554     | 1.26215  | 6.19342  | 3.818091 | 0.028962 |
| LRRC3B       | 1.308498 | 4.899016 | 3.813628 | 0.029053 |
| MYL2         | -1.4777  | 5.144022 | -3.81015 | 0.029125 |
| LOC101060391 | -1.8478  | 2.99356  | -3.80815 | 0.029166 |
| AI243098     | 1.287613 | 6.150357 | 3.807211 | 0.029185 |
| LY6G6E       | -1.32135 | 4.525584 | -3.80036 | 0.029327 |
| C18590       | -2.20241 | 4.250102 | -3.79933 | 0.029349 |
| U55186       | -3.18373 | 2.193913 | -3.79149 | 0.029512 |
| GNRHR2       | 1.242944 | 5.896745 | 3.786352 | 0.02962  |
| NSAP11       | 1.44649  | 3.551762 | 3.783534 | 0.029679 |
| AI393041     | 2.025459 | 5.716301 | 3.774583 | 0.029869 |
| RASGEF1B     | -1.58577 | 4.506837 | -3.76931 | 0.029981 |
| LOC100506071 | -2.0844  | 5.043311 | -3.76894 | 0.029989 |
| LOC101927482 | 2.160111 | 2.496327 | 3.768381 | 0.030001 |
| AI436561     | 1.542148 | 4.712697 | 3.75037  | 0.03039  |
| LINC01019    | 2.217209 | 4.105401 | 3.745163 | 0.030503 |
| T77543       | 2.358192 | 4.078715 | 3.744573 | 0.030516 |
| AA829860     | -1.75463 | 5.683461 | -3.74323 | 0.030545 |
| SAA2         | 2.77679  | 4.615312 | 3.741965 | 0.030573 |
| BF510545     | 2.544068 | 5.297128 | 3.735564 | 0.030714 |
| BF830560     | -1.8518  | 5.375167 | -3.73378 | 0.030753 |
| RNF112       | -1.68423 | 5.813811 | -3.72317 | 0.030988 |
| AFP          | 1.265576 | 7.061191 | 3.720191 | 0.031055 |
| AK024604     | -1.25756 | 6.630837 | -3.7095  | 0.031294 |
| OTX2         | 1.77791  | 4.614179 | 3.706818 | 0.031355 |
| AL137634     | 1.720606 | 6.61664  | 3.706296 | 0.031367 |
| BE840636     | -1.63005 | 2.605848 | -3.68952 | 0.031749 |
| TSIX         | 1.636506 | 6.120896 | 3.687274 | 0.031801 |
| CHL1-AS2     | 1.352787 | 6.238475 | 3.684045 | 0.031875 |
| TLR8-AS1     | 1.295495 | 6.057395 | 3.682934 | 0.031901 |
| LOC157273    | 1.868991 | 4.387014 | 3.681719 | 0.031929 |
| OR10A3       | 1.583747 | 5.286373 | 3.681711 | 0.031929 |
| ZNF703       | 1.250777 | 7.660064 | 3.677925 | 0.032017 |
| C17orf64     | 2.887086 | 4.902283 | 3.671572 | 0.032165 |
| W86659       | -2.41205 | 3.82485  | -3.67103 | 0.032178 |
| BF511307     | 1.727269 | 4.445466 | 3.669613 | 0.032211 |
| AL080215     | -2.25941 | 5.068442 | -3.66082 | 0.032417 |
| PRTN3        | 2.044031 | 5.398202 | 3.659462 | 0.032449 |
| AW341473     | -1.50924 | 3.371089 | -3.65288 | 0.032605 |
| EVI5L        | 1.470442 | 5.087902 | 3.652674 | 0.03261  |
| C8orf46      | 1.943151 | 5.526814 | 3.65101  | 0.03265  |
| R34775       | -1.40077 | 5.452511 | -3.6468  | 0.03275  |
| ATP6V1B1     | 1.916697 | 4.797624 | 3.643316 | 0.032833 |
| AL050039     | -1.65936 | 4.640317 | -3.6433  | 0.032834 |
| PYGM         | 2.046224 | 6.081492 | 3.638448 | 0.03295  |
| DNAH11       | 1.529991 | 4.986885 | 3.638137 | 0.032958 |
| AW771958     | -1.25044 | 6.704987 | -3.63176 | 0.033112 |
| BC037818     | 1.370611 | 5.252511 | 3.629747 | 0.033161 |

Table SI. Continued.

| Gene         | logFC    | AveExpr  | t value  | P-value  |
|--------------|----------|----------|----------|----------|
| AK025239     | 1.427155 | 4.810941 | 3.616346 | 0.033488 |
| BF510937     | -2.11024 | 4.446521 | -3.61534 | 0.033513 |
| EPHA5-AS1    | -1.58867 | 4.221397 | -3.60955 | 0.033655 |
| TRHDE        | -2.15619 | 2.949324 | -3.6073  | 0.033711 |
| KCNA2        | 1.393486 | 4.990768 | 3.593621 | 0.034052 |
| AL833742     | -1.56688 | 2.572483 | -3.59109 | 0.034116 |
| LOC105378419 | 1.710055 | 5.250008 | 3.588527 | 0.03418  |
| AA741565     | -1.51317 | 3.686854 | -3.57628 | 0.034491 |
| CD69         | 1.449685 | 3.152555 | 3.575317 | 0.034515 |
| USP20        | 1.243814 | 6.49003  | 3.574088 | 0.034547 |
| GOLT1A       | 2.701925 | 5.089368 | 3.565658 | 0.034763 |
| RIPPLY1      | 1.209013 | 5.13071  | 3.562899 | 0.034834 |
| LOC102723692 | 1.948704 | 6.5568   | 3.561329 | 0.034875 |
| ADGRF1       | 1.271117 | 3.796614 | 3.560647 | 0.034892 |
| BC036605     | -3.06097 | 4.062145 | -3.56014 | 0.034905 |
| AL137331     | 1.290189 | 4.703694 | 3.558974 | 0.034936 |
| AA948608     | -1.44529 | 4.399714 | -3.55518 | 0.035034 |
| AV700050     | 1.829765 | 6.44091  | 3.54839  | 0.035211 |
| ERC2         | -2.56666 | 3.440883 | -3.54258 | 0.035364 |
| CALHM2       | 1.587179 | 7.478005 | 3.542245 | 0.035373 |
| RUSC2        | 1.603183 | 7.510667 | 3.541212 | 0.0354   |
| BC040984     | 2.835474 | 4.776762 | 3.532691 | 0.035625 |
| LOC157562    | 1.331589 | 6.14761  | 3.52613  | 0.0358   |
| AL833493     | 2.022862 | 5.6212   | 3.514747 | 0.036106 |
| AL049342     | 2.276849 | 4.302293 | 3.495749 | 0.036624 |
| HIST1H3C     | -1.27015 | 4.221688 | -3.49102 | 0.036754 |
| BC039482     | -1.87718 | 3.275063 | -3.49096 | 0.036756 |
| CCDC60       | -1.41254 | 7.336565 | -3.49057 | 0.036766 |
| BC041921     | 2.458286 | 4.533287 | 3.489448 | 0.036798 |
| BC041822     | -2.44696 | 3.919665 | -3.48856 | 0.036822 |
| OR5I1        | 2.402099 | 6.126719 | 3.477697 | 0.037124 |
| REEP2        | 1.319008 | 7.349855 | 3.458004 | 0.037681 |
| AK022473     | -1.22874 | 6.108083 | -3.45659 | 0.037721 |
| AK026032     | -1.71319 | 3.74884  | -3.44872 | 0.037946 |
| RACGAP1P     | -1.25626 | 4.935453 | -3.44821 | 0.037961 |
| C2CD4A       | 1.48845  | 3.650426 | 3.446158 | 0.03802  |
| LOC100133039 | 1.234057 | 6.686054 | 3.434299 | 0.038364 |
| R41431       | -1.72953 | 3.932518 | -3.43412 | 0.038369 |
| AW183655     | -2.20998 | 5.806564 | -3.42713 | 0.038574 |
| BC037945     | -1.97235 | 4.065622 | -3.42632 | 0.038597 |
| BE468087     | 1.474555 | 3.554635 | 3.425998 | 0.038607 |
| AF334590     | -1.83056 | 3.533737 | -3.42562 | 0.038618 |
| FAM167A-AS1  | 1.456418 | 3.941184 | 3.423122 | 0.038691 |
| AK021584     | -1.60586 | 5.551204 | -3.42134 | 0.038744 |
| BQ711690     | -2.80565 | 2.931116 | -3.42128 | 0.038746 |
| AK074310     | 1.664448 | 4.882043 | 3.418543 | 0.038827 |
| BE972639     | -2.38065 | 4.574546 | -3.41842 | 0.03883  |
| AW204766     | 3.82547  | 2.745886 | 3.410613 | 0.039062 |
| BE674276     | 1.378498 | 4.360926 | 3.402833 | 0.039295 |
| AA411712     | 1.398703 | 5.398113 | 3.399849 | 0.039385 |
| BC012388     | 1.390793 | 4.056863 | 3.399041 | 0.039409 |
| BC015673     | 1.859133 | 4.570077 | 3.394432 | 0.039549 |
| AF085978     | -1.26704 | 4.304876 | -3.3898  | 0.039689 |
| AK024098     | -1.45666 | 5.120182 | -3.38297 | 0.039898 |
| LOC283861    | -1.24394 | 5.757457 | -3.37507 | 0.040141 |
| BC031022     | -2.69316 | 3.71839  | -3.37378 | 0.04018  |

Table SI. Continued.

| Gene         | logFC    | AveExpr  | t value  | P-value  |
|--------------|----------|----------|----------|----------|
| TMEM176A     | 1.388092 | 7.406231 | 3.372114 | 0.040232 |
| R80390       | -1.92297 | 5.718059 | -3.37099 | 0.040267 |
| TULP1        | 2.512825 | 4.605365 | 3.352308 | 0.040851 |
| LOC100507568 | 1.436893 | 5.124025 | 3.349346 | 0.040944 |
| PRINS        | 1.388135 | 7.540417 | 3.347324 | 0.041008 |
| LOC100506603 | -2.10601 | 5.977306 | -3.34683 | 0.041024 |
| C7orf57      | -2.45112 | 0.796189 | -3.34195 | 0.041179 |
| AL133627     | 1.493098 | 5.571374 | 3.340813 | 0.041215 |
| AA016292     | -2.19021 | 3.047109 | -3.34011 | 0.041238 |
| SLC24A4      | 1.392324 | 4.614052 | 3.337142 | 0.041332 |
| RASAL3       | 1.620386 | 5.956579 | 3.333163 | 0.04146  |
| ZFP69B       | -1.38327 | 6.363894 | -3.32807 | 0.041624 |
| S81973       | -1.68825 | 3.115291 | -3.32756 | 0.041641 |
| LOC100996385 | 1.399802 | 6.329953 | 3.326678 | 0.041669 |
| R52692       | -1.57087 | 3.235144 | -3.3253  | 0.041714 |
| AL389956     | -1.31937 | 4.964679 | -3.31921 | 0.041912 |
| AK097242     | -1.69902 | 3.745857 | -3.30649 | 0.042328 |
| MMP10        | 2.098776 | 4.630815 | 3.30388  | 0.042415 |
| LOC653160    | 1.448563 | 6.34787  | 3.299248 | 0.042568 |
| LOC100506235 | -1.6406  | 4.440487 | -3.29251 | 0.042793 |
| AW166847     | 1.738106 | 5.166175 | 3.288258 | 0.042935 |
| AL832806     | -1.3517  | 6.210341 | -3.28743 | 0.042963 |
| BC043438     | -2.34522 | 3.614456 | -3.28341 | 0.043098 |
| AW629429     | 1.316414 | 6.034315 | 3.280097 | 0.04321  |
| AL833074     | -1.74216 | 4.525415 | -3.27769 | 0.043292 |
| AL832898     | 1.996425 | 4.219957 | 3.275784 | 0.043356 |
| CRYGA        | 1.483517 | 4.401133 | 3.274519 | 0.043399 |
| BG772703     | 1.269466 | 6.392    | 3.270335 | 0.043542 |
| BE348304     | 1.445534 | 4.385669 | 3.26946  | 0.043572 |
| AI393727     | 1.581294 | 4.844412 | 3.267874 | 0.043626 |
| SSTR5        | 1.793281 | 4.287976 | 3.265754 | 0.043699 |
| ATOH1        | 1.874247 | 5.794254 | 3.261806 | 0.043835 |
| PLA1A        | 1.908834 | 5.935437 | 3.249407 | 0.044264 |
| NKG7         | -1.39985 | 2.428851 | -3.24812 | 0.044309 |
| C12orf42     | 1.468353 | 5.379793 | 3.246017 | 0.044383 |
| AI654853     | 1.555452 | 4.765563 | 3.237827 | 0.044671 |
| TMEM25       | 1.678431 | 5.494375 | 3.234571 | 0.044786 |
| AI360054     | -1.31958 | 5.997015 | -3.23097 | 0.044913 |
| NKAPP1       | -1.52128 | 5.692086 | -3.22593 | 0.045093 |
| RBAKDN       | -2.27449 | 4.705047 | -3.22162 | 0.045247 |
| AF116673     | 2.20291  | 5.551123 | 3.221152 | 0.045264 |
| FLG-AS1      | 1.265574 | 6.35909  | 3.221152 | 0.045264 |
| ANKRD45      | 1.676343 | 4.428598 | 3.218536 | 0.045358 |
| AF085837     | 2.952165 | 4.520356 | 3.216781 | 0.045421 |
| AI081227     | -1.65986 | 4.420509 | -3.21289 | 0.045561 |
| AA620926     | -1.7683  | 4.167427 | -3.21219 | 0.045586 |
| ACADL        | 1.399242 | 5.079537 | 3.211254 | 0.04562  |
| TEX13B       | -1.85058 | 5.897408 | -3.20913 | 0.045697 |
| AW205919     | 2.249276 | 7.246588 | 3.2081   | 0.045735 |
| AI307430     | -1.60314 | 2.154695 | -3.20808 | 0.045735 |
| DKFZP434A062 | 1.316164 | 5.516105 | 3.207892 | 0.045742 |
| BC020857     | -2.76793 | 1.731749 | -3.20609 | 0.045808 |
| IDNK         | 1.455012 | 7.539003 | 3.205073 | 0.045845 |
| MYO18B       | 1.211913 | 5.929416 | 3.204872 | 0.045852 |
| MIR4755      | -2.49318 | 5.335067 | -3.19632 | 0.046165 |
| R06363       | 1.450966 | 4.091804 | 3.189234 | 0.046426 |

Table SI. Continued.

| Gene         | logFC    | AveExpr  | t value  | P-value  |
|--------------|----------|----------|----------|----------|
| LOC102723809 | 2.229473 | 4.341995 | 3.188448 | 0.046456 |
| L3MBTL4      | 1.285139 | 6.101623 | 3.186099 | 0.046543 |
| IL34         | 1.208178 | 7.10189  | 3.180357 | 0.046756 |
| BC026219     | 1.437169 | 6.470212 | 3.177426 | 0.046866 |
| TAAR1        | 1.666678 | 4.559054 | 3.164204 | 0.047364 |
| RGMB-AS1     | 1.698766 | 4.83371  | 3.1615   | 0.047467 |
| KANK3        | 1.426388 | 4.302781 | 3.15634  | 0.047664 |
| AI825825     | 1.232494 | 5.853663 | 3.155014 | 0.047715 |
| AL713663     | -1.51233 | 6.360635 | -3.14383 | 0.048145 |
| BC042015     | -1.72731 | 2.660759 | -3.14066 | 0.048269 |
| SLC35G3      | 1.659853 | 3.005873 | 3.140352 | 0.04828  |
| TRHDE-AS1    | -1.69758 | 4.565239 | -3.13746 | 0.048393 |
| LOC101927869 | 1.252308 | 5.30868  | 3.134905 | 0.048493 |
| BC007115     | -3.69708 | 2.664224 | -3.13143 | 0.048629 |
| HIST3H3      | -1.78952 | 3.981327 | -3.12984 | 0.048691 |
| FGF19        | -1.80356 | 5.097564 | -3.12726 | 0.048793 |
| AW134523     | -1.29713 | 5.7104   | -3.11982 | 0.049087 |
| FN3K         | -2.04739 | 4.37935  | -3.11606 | 0.049236 |
| GZMM         | 3.314151 | 5.052193 | 3.115972 | 0.04924  |
| SYT14        | -1.57499 | 2.730599 | -3.10723 | 0.049589 |
| LOC729652    | -2.03373 | 2.311684 | -3.10684 | 0.049605 |
| AA830640     | 1.37203  | 5.911695 | 3.101694 | 0.049812 |
| AK026816     | -1.866   | 5.968699 | -3.10102 | 0.04984  |

Table SII. Biological functions enrichment.

| Term                              | Count | %     | P-value   | Genes                                                                                                                                                                                                                                                                                                                                                                                                                                                                                                                                                                                                                                                                                                                                                                                                                                                                                                                                                                                                                                                                                                                                                                                                                                                                           |
|-----------------------------------|-------|-------|-----------|---------------------------------------------------------------------------------------------------------------------------------------------------------------------------------------------------------------------------------------------------------------------------------------------------------------------------------------------------------------------------------------------------------------------------------------------------------------------------------------------------------------------------------------------------------------------------------------------------------------------------------------------------------------------------------------------------------------------------------------------------------------------------------------------------------------------------------------------------------------------------------------------------------------------------------------------------------------------------------------------------------------------------------------------------------------------------------------------------------------------------------------------------------------------------------------------------------------------------------------------------------------------------------|
| GO:0005615~extracellular space    | 77    | 9.11  | 0.0000003 | FGF6, S100A8, IGFBP7, EDN2, BTC, ANPEP, SAA2, ERFE, CDNF, SERPINA6, SCRG1, GPC6, FAP, CEACAM8, KLK11, LOX, INA, SEMG1, LY96, ACTA2, CRISP2, SPINT1, MFGE8, IL24, MMP10, UCN2, THBD, SERPINF1, SERPINF2, F3, F2, ULBP2, PLA2G2A, WFDC1, CSTA, CA2, EPYC, GC, RBP4, ACHE, CCL2, C3, PRTN3, CPQ, RBP3, LUM, CXCL3, C5, GSDMD, CCL8, CD70, TIMP4, IL34, SERPINH1, CCL27, AZU1, IL17A, LGALS3BP, PRSS2, PTH, MSLN, DEFB1, PCSK5, BMP3, KLK8, PODXL, FBN1, HSPG2, C4BPB, ECM2, IL36RN, LCN2, AFP, SULF2, HBEGF, IGFBP1, CPBI                                                                                                                                                                                                                                                                                                                                                                                                                                                                                                                                                                                                                                                                                                                                                          |
| GO:0005576~extracellular region   | 87    | 10.30 | 0.0000005 | FGF6, FGF19, INSL5, ADGRF1, S100A8, IGFBP7, EDN2, ARSI, NELL2, BTC, PGLYRP1, CGREF1, RAET1E, ART5, ERFE, DMKN, PLA1A, LOX, CSF2RA, PRSS37, MATN3, WFDC10B, ZPI1, SEMG1, SCUBE2, CRISP2, COLEC10, SPINT1, DLL1, MFGE8, IL24, TPSD1, TMEM25, GZMM, WFDC11, MMP10, CBLN1, UCN2, SERPINF1, SERPINF2, F2, PLA2G2A, PLA2G2D, GC, RBP4, DEFB108B, ENPP6, ACHE, CCL2, DEFB124, C3, C6, RBP3, LUM, CXCL3, C5, OAS1, TMEM155, IL34, MDK, CCL27, AZU1, ISLR, IL17A, LAMB3, LGALS3BP, BCHE, PRSS2, PTH, PYCARD, CDA, MR1, DEFB1, NMU, BMP3, FBN1, HSPG2, C4BPB, NID2, R3HDM1, LCN2, TULP1, HIST1H3A, VSTM2L, HIST1H3C, HBEGF, IGFBP1                                                                                                                                                                                                                                                                                                                                                                                                                                                                                                                                                                                                                                                        |
| GO:0006954~inflammatory response  | 29    | 3.43  | 0.0000278 | NMI, CCL2, S100A8, C3, CXCL3, C5, GSDMD, CCL8, IL34, AZU1, IL17A, PYCARD, MGLL, VNN1, FAS, TNIP3, BLNK, TLR10, LY96, IL1RL2, EPHX2, IL24, IFI16, TNFRSF10C, ALOX15, CCR4, AOX1, NAIP, PLA2G2D                                                                                                                                                                                                                                                                                                                                                                                                                                                                                                                                                                                                                                                                                                                                                                                                                                                                                                                                                                                                                                                                                   |
| GO:0005886~plasma membrane        | 169   | 20.00 | 0.0000613 | TSPAN1, S100A8, C6ORF25, BTC, AQP5, RRAD, GRIN3A, IL31RA, GP9, ATP2B2, ANK1, SLC2A3, GPR45, ZNF185, FAP, VNN1, ERAP2, MCOLN1, FAS, ADGRB3, ARC, CLRN1, DUOXA1, EFNB2, MDGA2, VANGL2, TRPA1, DLL1, C1ORF210, TMEM25, PKD2L1, SSTR5, KRT19, THBD, VAMP8, HAS1, CD34, CCR4, F3, F2, FER1L5, MGAM, PLA2G2A, AKAP5, PDGFRA, C2CD4A, PSCA, MST1R, SLC30A10, EPS8L2, EMP1, NEURL1, CAV3, ENPP6, ACHE, LY6G6F, SCN1A, SLC2A11, PRLHR, KCNA2, IFITM3, GSDMD, ITGB4, CD70, NOSTRIN, MRAP2, PTPRCAP, SLC32A1, ITGB7, MSLN, OPN1MW3, ADRA2A, IFITM10, BLNK, TYROBP, TLR10, TESC, IL1RL2, PODXL, KIR2DS2, TNFRSF13C, BFSP2, UPK3B, SLAMF7, CACNA2D3, TULP1, LAMP3, KLRC4-KLRK1, SYT14, ADRA1B, TM4SF20, ITGAD, DIO1, PRX, IGDCC4, OR10A3, LIMA1, ADGRF1, OR10A4, PCDHB18P, DUOX2, LSR, EDNRB, VNIR4, KCNQ4, SLC23A1, RAET1E, FRMD6, SLC24A4, GPC6, CEACAM8, MGLL, TAAR1, FAM129A, CSF2RA, ATP8B4, OR511, ZP1, CPTP, LY96, NPBWR2, PCDH9, SPINT1, RFTN1, ALOX15, TNFRSF10C, TDGF1P3, IL20RB, SLC26A7, MDM2, GUCY1B2, SUSD3, CA2, GPR17, GRASP, DCHS2, RAB3B, C3, PRTN3, GPRC5A, DGKA, UNC79, DGKB, RASGRP2, FAT2, INPP5D, MC3R, MR1, SCNN1B, GNRHR2, ABCA12, MICALL2, MPZ, SELL, HSPG2, ASIC2, C4BPB, DGKI, ANXA3, XPNPEP2, RGS13, KCNN4, GRIA2, PDE2A, SULF2, FCGR2C, HBEGF, TAPBP, ATP6V0A4 |
| GO:0045087~innate immune response | 29    | 3.43  | 0.0002419 | DEFB108B, S100A8, DEFB124, C6, GSDMD, PGLYRP1, IL34, APOBEC3C, PYCARD, VNN1, MR1, DEFB1, SH2D1B, TYROBP, TEC, TLR10, NCF2, LY96, IL1RL2, KIR2DS2, C4BPB, IFI16, IL36RN, GZMM, LCN2, TRIM31, KLRC4-KLRK1, NAIP, MST1R                                                                                                                                                                                                                                                                                                                                                                                                                                                                                                                                                                                                                                                                                                                                                                                                                                                                                                                                                                                                                                                            |



Table SII. Continued.

| Term                                                                                             | Count | %    | P-value   | Genes                                                                                                                                                                                                                                                                                                                                                                                                                                                                                               |
|--------------------------------------------------------------------------------------------------|-------|------|-----------|-----------------------------------------------------------------------------------------------------------------------------------------------------------------------------------------------------------------------------------------------------------------------------------------------------------------------------------------------------------------------------------------------------------------------------------------------------------------------------------------------------|
| GO:0005509~calcium ion binding                                                                   | 41    | 4.85 | 0.0003599 | PLCZ1, S100A3, DCHS2, S100A8, PCDBHB18P, MYL2, TNNC1, DUOX2, NELL2, MYL9, DGKA, ATP2B2, CGREF1, DGKB, SLC24A4, CD69, PRSS2, FAT2, RASGRP2, S100A2, MATN3, TESC, S100P, SCUBE2, FBNI, HSPG2, PCDH9, DLL1, NID2, PKD2L1, ANXA3, MMP10, CLGN, THBD, SULF2, F2, HPCA, SYT14, PLA2G2A, C2CD4A, PLA2G2D                                                                                                                                                                                                   |
| GO:0006629~lipid metabolic process                                                               | 14    | 1.66 | 0.0014174 | PLCZ1, ENPP6, RBP3, SLC16A11, GDDP3, MTP, PLCL2, PNPLA7, FAR2, CH25H, MGLL, PLA1A, RDH16, PC                                                                                                                                                                                                                                                                                                                                                                                                        |
| GO:0005887~integral component of plasma membrane                                                 | 65    | 7.69 | 0.0017201 | CALHM2, SLC52A1, TSPAN1, SLC16A11, AQP5, ANPEP, GJA5, GP9, ATP2B2, EDNRB, SLC23A1, SLC24A4, SLC2A3, GPC6, CEACAM8, MCOLN1, FAS, CSF2RA, EFNB2, TRPA1, NPBWR2, DLL1, SSTR5, TNFRSF10C, THBD, HAS1, SLC26A7, CD34, CCR4, CSPG4P5, PDGFRA, MST1R, GPR17, PRLHR, KCNA2, SLC39A12, CD70, GPR1, GPRC5A, GPR3, C2ORF83, CD69, ADRA2A, MC3R, SCNN1B, GAL3ST1, GNRHR2, TYROBP, FAM26D, TLR10, MPZ, TRHDE, PTPRZ1, SELL, ASIC4, IL1RL2, PODXL, ASIC2, KIR2DS2, REEP2, GRIA2, ADRA1B, KLRC4-KLRK1, HBEGF, NKG7 |
| GO:0042246~tissue regeneration                                                                   | 5     | 0.59 | 0.0025893 | CPQ, TXK, IGFBP1, TM4SF4, TEC                                                                                                                                                                                                                                                                                                                                                                                                                                                                       |
| GO:0042771~intrinsic apoptotic signaling pathway in response to DNA damage by p53 class mediator | 6     | 0.71 | 0.0026256 | CDKN1A, NUPR1, CDIP1, PYCARD, IFI16, PMAIP1                                                                                                                                                                                                                                                                                                                                                                                                                                                         |
| GO:0031225~anchored component of membrane                                                        | 11    | 1.30 | 0.0028401 | ENPP6, ACHE, TNFRSF10C, GPC6, CEACAM8, MSLN, MDGA2, DPEP3, VNN1, PSCA, XPNPEP2                                                                                                                                                                                                                                                                                                                                                                                                                      |
| GO:0009611~response to wounding                                                                  | 8     | 0.95 | 0.0035628 | KLK8, ACHE, CCL2, SULF2, F2, ITGB4, MDK, NMNAT1                                                                                                                                                                                                                                                                                                                                                                                                                                                     |
| GO:0008236~serine-type peptidase activity                                                        | 8     | 0.95 | 0.0036075 | GZMM, IMMP2L, PRTN3, FAP, RBP3, PRSS2, KLK11, TPSD1                                                                                                                                                                                                                                                                                                                                                                                                                                                 |
| GO:0030018~Z disc                                                                                | 11    | 1.30 | 0.0038844 | CAV3, SCN1A, KRT19, MYO18B, ANK1, CRYAB, FHOD3, MYOZ2, MYOT, SYNPO, MYL9                                                                                                                                                                                                                                                                                                                                                                                                                            |
| GO:0008217~regulation of blood pressure                                                          | 8     | 0.95 | 0.0042487 | EDNRB, TRHDE, CD34, ACTA2, EPHX2, DLL1, ERAP2, MC3R                                                                                                                                                                                                                                                                                                                                                                                                                                                 |
| GO:0060326~cell chemotaxis                                                                       | 8     | 0.95 | 0.0042487 | AZU1, CCL2, SAA2, C5, PDGFRA, CCL8, HBEGF, CCL27                                                                                                                                                                                                                                                                                                                                                                                                                                                    |
| GO:0005536~glucose binding                                                                       | 4     | 0.47 | 0.0042732 | GCK, SLC2A3, HKDC1, HK2                                                                                                                                                                                                                                                                                                                                                                                                                                                                             |
| GO:0007155~cell adhesion                                                                         | 26    | 3.08 | 0.0056967 | ACHE, CCL2, CYP1B1, IGFBP7, ITGB4, GP9, ISLR, KIAA1462, LGALS3BP, LAMB3, CGREF1, FAP, ITGB7, MSLN, SELL, PODXL, EFNB2, MFGE8, SLAMF7, NID2, CTNNA2, CD34, HAS1, SUSD5, ITGAD, TGFB11                                                                                                                                                                                                                                                                                                                |
| GO:0048246~macrophage chemotaxis                                                                 | 4     | 0.47 | 0.0070228 | AZU1, EDNRB, CCL2, EDN2                                                                                                                                                                                                                                                                                                                                                                                                                                                                             |
| GO:0002526~acute inflammatory response                                                           | 4     | 0.47 | 0.0070228 | S100A8, NUPR1, VNN1, DEFB1                                                                                                                                                                                                                                                                                                                                                                                                                                                                          |
| GO:0005261~cation channel activity                                                               | 5     | 0.59 | 0.0073374 | FAM26D, CALHM2, TMEM38A, MCOLN1, PKD2L1                                                                                                                                                                                                                                                                                                                                                                                                                                                             |
| GO:0009615~response to virus                                                                     | 10    | 1.18 | 0.0079544 | LCN2, IFIT2, IFIT1, ACTA2, IFITM3, DUOX2, CCL8, OAS1, MST1R, TRIM22                                                                                                                                                                                                                                                                                                                                                                                                                                 |
| GO:0001678~cellular glucose homeostasis                                                          | 4     | 0.47 | 0.0087315 | GCKR, GCK, HKDC1, HK2                                                                                                                                                                                                                                                                                                                                                                                                                                                                               |

Table SII. Continued.

| Term                                           | Count | %     | P-value   | Genes                                                                                                                                                                                                                                                                                                                                                                                                                                                                                                                                                                                                                                                                                                                                                                                                                                                                                                                                                                                                                                                                                                                                                                                                                                                                                                                                                                                                                                                                                                                                                                                    |
|------------------------------------------------|-------|-------|-----------|------------------------------------------------------------------------------------------------------------------------------------------------------------------------------------------------------------------------------------------------------------------------------------------------------------------------------------------------------------------------------------------------------------------------------------------------------------------------------------------------------------------------------------------------------------------------------------------------------------------------------------------------------------------------------------------------------------------------------------------------------------------------------------------------------------------------------------------------------------------------------------------------------------------------------------------------------------------------------------------------------------------------------------------------------------------------------------------------------------------------------------------------------------------------------------------------------------------------------------------------------------------------------------------------------------------------------------------------------------------------------------------------------------------------------------------------------------------------------------------------------------------------------------------------------------------------------------------|
| GO:0016021~integral component of membrane      | 188   | 22.25 | 0.0091002 | C15ORF48, RARRES1, PEAR1, C6ORF25, LRTM1, NELL2, BTC, GRIN3A, IL31RA, ATP2B2, SLC2A3, GPR45, FAP, TMEM52B, CH25H, B3GALNT1, VNN1, ERAP2, MCOLN1, CREB3L3, FAS, ADGRB3, CLRN1, SLC12A8, GOLT1A, FAXDC2, SPTLC3, DUOXAI, MDGA2, VANGL2, TRPA1, C1ORF210, DLL1, TMEM25, PKD2L1, TMEM27, PNPLA7, SSTR5, LOC653160, SLC25A31, LILRB5, VAMP8, CCR4, CD34, HAS1, F3, TMEM139, FERIL5, MGAM, MSTIR, SLC30A10, EMP1, FAM163A, CAV3, LY6G6E, ACHE, LY6G6F, SCN1A, GAL3ST4, SLC2A11, PRLHR, CYP1B1, IFITM3, C3ORF18, CCDC167, CD70, SLC38A11, MRAP2, PTPRCAP, TMCC3, SYNDIG1L, SLC32A1, CD69, BCHE, ITGB7, FAM189A1, OPN1MW3, FAM162B, IFITM10, GAL3ST1, TYROBP, TMEM221, TLR10, NOMO3, ACER2, PODXL, KIR2DS2, TNFRSF13C, UPK3B, SLAMF7, REEP2, LAMP3, CLGN, SYT14, KLRC4-KLRK1, TM4SF20, SLC35G3, DIO1, NKG7, ALG12, ADGRF2, IGDCC4, OR10A3, ADGRF1, OR10A4, PCDHB18P, GREB1, SLC16A11, DUOX2, ANPEP, LTC4S, LSR, GJA5, FRMD3, C2ORF141, FAR2, EDNRB, IMM2L, VNIIR4, KCNQ4, RAET1E, GALNTL5, POMT1, GALNTL6, TAAR1, PPP1R14C, ATP8B4, NIPAL4, OR5I1, CEACAM21, ZP1, WBSCR17, TMEM255A, NPBWR2, TMEM38A, PCDH9, SPINT1, TNFRSF10C, ZDHHC11, IL20RB, SLC26A7, CHST8, SUSD3, GPR17, GRAMD1C, TM4SF4, DCHS2, FUT9, COX7B2, TMEM257, SEC14L3, GPR1, NAALADL2, GPRC5A, SCARF2, GPR3, C2ORF82, UNC79, RNF128, FAT2, UGT2A2, MIR1, SCNN1B, PCSK5, GNRHR2, ABCA12, SOAT2, PTPRZ1, SELL, TMC2, HOGA1, SUN3, TMC1, GDDP3, RNF112, RPRML, KCNN4, GRIA2, FCGR2C, LRRC3B, LRRN1, SPATA31A5, EVI5L, RDH16, TAPBPL, ATP6V0A4, TMEM176A<br>GCK, HKDC1, HK2<br>GCK, HKDC1, HK2<br>GCK, HKDC1, HK2<br>GCK, HKDC1, HK2 |
| GO:0008865~fructokinase activity               | 3     | 0.36  | 0.0093396 |                                                                                                                                                                                                                                                                                                                                                                                                                                                                                                                                                                                                                                                                                                                                                                                                                                                                                                                                                                                                                                                                                                                                                                                                                                                                                                                                                                                                                                                                                                                                                                                          |
| GO:0004340~glucokinase activity                | 3     | 0.36  | 0.0093396 |                                                                                                                                                                                                                                                                                                                                                                                                                                                                                                                                                                                                                                                                                                                                                                                                                                                                                                                                                                                                                                                                                                                                                                                                                                                                                                                                                                                                                                                                                                                                                                                          |
| GO:0019158~mannokinase activity                | 3     | 0.36  | 0.0093396 |                                                                                                                                                                                                                                                                                                                                                                                                                                                                                                                                                                                                                                                                                                                                                                                                                                                                                                                                                                                                                                                                                                                                                                                                                                                                                                                                                                                                                                                                                                                                                                                          |
| GO:0004396~hexokinase activity                 | 3     | 0.36  | 0.0093396 |                                                                                                                                                                                                                                                                                                                                                                                                                                                                                                                                                                                                                                                                                                                                                                                                                                                                                                                                                                                                                                                                                                                                                                                                                                                                                                                                                                                                                                                                                                                                                                                          |
| GO:0007219~Notch signaling pathway             | 10    | 1.18  | 0.0105069 | ATOH1, KRT19, RIPPLY1, SUSD5, DLL1, TIMP4, NEURL1B, MESP1, MDK, NEURL1                                                                                                                                                                                                                                                                                                                                                                                                                                                                                                                                                                                                                                                                                                                                                                                                                                                                                                                                                                                                                                                                                                                                                                                                                                                                                                                                                                                                                                                                                                                   |
| GO:0070062~extracellular exosome               | 109   | 12.90 | 0.0114397 | SNCG, TSPAN1, RARRES1, S100A8, RUSC2, PGLYRP1, AQP5, ALDH1L2, ATP2B2, SLC2A3, TMEM52B, PLA1A, VNN1, FAS, HIST3H3, SEMG1, CRYAB, MFG8, SCEL, TMEM27, KRT19, SERPINF1, SERPINF2, VAMP8, F3, F2, MGAM, PLA2G2A, PSCA, CSTA, EPS8L2, GC, RBP4, ENPP6, GAL3ST4, ASS1, IFITM3, ITGB4, CD70, FAM212A, ATP6V1B1, SERPINH1, LGALS3BP, ITGB7, RASAL3, DEFB1, ARHGDIB, BMP3, S100P, UFSP1, PODXL, EPHX2, UPK3B, MUC7, REEP2, PSMB8, LCN2, C1ORF116, HIST1H3A, CYFIP2, HIST1H3C, MYH13, QPRT, GREB1, IGFBP7, DUOX2, ANPEP, LSR, TP53I3, SLC23A1, SAA2, SERPINA6, DMKN, CEACAM8, KLK11, FAM129A, ACTA2, TMEM38A, SPINT1, RFTN1, CLIC3, NAIP, CA2, PPFIA2, RAB3B, PRTN3, C3, C6, CPQ, LUM, C5, SEC14L3, GPRC5A, AZU1, ISLR, FAT2, SCNN1B, TRHDE, HOGA1, FBNI, HSPG2, NID2, GDDP3, ANXA3, XPNPEP2, PYGM, AOX1, ATP6V0A4, HIST1H2AL                                                                                                                                                                                                                                                                                                                                                                                                                                                                                                                                                                                                                                                                                                                                                                      |
| GO:0048786~presynaptic active zone             | 5     | 0.59  | 0.0120193 | SLC32A1, PPFIA2, ERC2, DGKI, UNC13A                                                                                                                                                                                                                                                                                                                                                                                                                                                                                                                                                                                                                                                                                                                                                                                                                                                                                                                                                                                                                                                                                                                                                                                                                                                                                                                                                                                                                                                                                                                                                      |
| GO:0070588~calcium ion transmembrane transport | 10    | 1.18  | 0.0129569 | ATP2B2, PDE2A, SLC24A4, TMC2, TRPA1, MCOLN1, TMC1, GRIN3A, CACNA2D3, PKD2L1                                                                                                                                                                                                                                                                                                                                                                                                                                                                                                                                                                                                                                                                                                                                                                                                                                                                                                                                                                                                                                                                                                                                                                                                                                                                                                                                                                                                                                                                                                              |

Table SII. Continued.

| Term                                                                        | Count | %    | P-value   | Genes                                                                                                                                                            |
|-----------------------------------------------------------------------------|-------|------|-----------|------------------------------------------------------------------------------------------------------------------------------------------------------------------|
| GO:2000379~positive regulation of reactive oxygen species metabolic process | 5     | 0.59 | 0.0139395 | PIDI, CDKN1A, DUOXAI1, F2, GADD45A                                                                                                                               |
| GO:0010951~negative regulation of endopeptidase activity                    | 10    | 1.18 | 0.0143301 | SERPINF1, C3, SERPINF2, SERPINA6, C5, SPINT1, WFDC1, TIMP4, CSTA, SERPINHI                                                                                       |
| GO:0002020~protease binding                                                 | 9     | 1.07 | 0.0145956 | LCN2, SERPINF2, SELL, F3, FAP, PYCARD, TIMP4, CD70, CSTA                                                                                                         |
| GO:0010466~negative regulation of peptidase activity                        | 4     | 0.47 | 0.0152097 | WFDC10B, PTTG2, CSTA, R3HDM1                                                                                                                                     |
| GO:0030193~regulation of blood coagulation                                  | 4     | 0.47 | 0.0152097 | LBH, F2, ASIC2, FAM46A                                                                                                                                           |
| GO:0004252~serine-type endopeptidase activity                               | 16    | 1.89 | 0.0157953 | KLK8, C3, PRTN3, COLEC10, TPSDI, GZMM, AZU1, MMP2L, MMP10, F3, FAP, PRSS2, F2, KLK11, PCSK5, PRSS37                                                              |
| GO:0009636~response to toxic substance                                      | 8     | 0.95 | 0.0176623 | CDKN1A, SLC23A1, CYP1B1, NUPR1, EPHX2, MDM2, FAS, NEFL                                                                                                           |
| GO:0043204~perikaryon                                                       | 9     | 1.07 | 0.0179499 | AMIGO1, CCL2, ASS1, CRYAB, KCNA2, HPCA, NAIP, SYNPO, NEURL1                                                                                                      |
| GO:2000427~positive regulation of apoptotic cell clearance                  | 3     | 0.36 | 0.0187264 | CCL2, C3, MFGE8                                                                                                                                                  |
| GO:0030198~extracellular matrix organization                                | 13    | 1.54 | 0.0216608 | MATN3, LUM, FBN1, HSPG2, ITGB4, SPINT1, NID2, ECM2, LAMB3, ITGB7, POMT1, ITGAD, LOX                                                                              |
| GO:0008284~positive regulation of cell proliferation                        | 24    | 2.84 | 0.0228901 | FGF6, CAV3, FGF19, PRTN3, ACER2, EDN2, BTC, EFN2, DLL1, IL24, IL34, PRAMEF10, IL3IRA, EDNRB, ZNF703, ATF3, PRAMEF2, F2, BNC1, ADRA2A, PDGFRA, HBEGF, MDM2, MST1R |
| GO:0005262~calcium channel activity                                         | 7     | 0.83 | 0.0230030 | PDE2A, SLC24A4, TRPA1, MCOLN1, GRIN3A, CACNA2D3, PKD2L1                                                                                                          |
| GO:0030101~natural killer cell activation                                   | 4     | 0.47 | 0.0237847 | ULBP2, KLRC4-KLRK1, KIR2DS2, SLAMF7                                                                                                                              |
| GO:0042923~neuropeptide binding                                             | 4     | 0.47 | 0.0239247 | SSTR5, NPBWR2, MC3R, GPR1                                                                                                                                        |
| GO:0010544~negative regulation of platelet activation                       | 3     | 0.36 | 0.0244530 | THBD, F2, PDGFRA                                                                                                                                                 |
| GO:0006955~immune response                                                  | 22    | 2.60 | 0.0262525 | TLR10, CCL2, C3, CXCL3, IFITM3, PGLYRP1, KIR2DS2, CCL8, OAS1, CD70, IL24, TRIM22, CCL27, TNFRSF10C, IL17A, CCR4, FCGR2C, CEACAM8, ITGAD, MR1, FAS, DEFB1         |
| GO:0001725~stress fiber                                                     | 6     | 0.71 | 0.0262604 | MICALL2, LIMA1, VANGL2, MST1R, SYNPO, MYL9                                                                                                                       |
| GO:0071222~cellular response to lipopolysaccharide                          | 9     | 1.07 | 0.0264422 | LCN2, EDNRB, CCL2, ASS1, PYCARD, KLRC4-KLRK1, IL24, NFKBIL1, TNIP3                                                                                               |
| GO:0019835~cytolysis                                                        | 4     | 0.47 | 0.0271148 | GZMM, C6, C5, GSDMD                                                                                                                                              |
| GO:0035725~sodium ion transmembrane transport                               | 7     | 0.83 | 0.0273596 | SLC23A1, SCN1A, SLC24A4, ASIC4, ASIC2, SCNN1B, PKD2L1                                                                                                            |
| GO:0043171~peptide catabolic process                                        | 4     | 0.47 | 0.0306800 | TRHDE, CPQ, ERAP2, ANPEP                                                                                                                                         |
| GO:0008201~heparin binding                                                  | 11    | 1.30 | 0.0307041 | AZU1, CCL2, SELL, C6ORF25, FBN1, CCL8, HBEGF, ECM2, EPYC, MDK, PLA2G2D                                                                                           |
| GO:0010831~positive regulation of myotube differentiation                   | 3     | 0.36 | 0.0307922 | CAV3, MYOG, SMYD1                                                                                                                                                |
| GO:0097186~amelogenesis                                                     | 3     | 0.36 | 0.0307922 | SLC24A4, ENAM, ITGB4                                                                                                                                             |
| GO:0030017~sarcomere                                                        | 5     | 0.59 | 0.0326464 | MYO18B, MYL2, ANKRD2, TIMP4, MYOZ2                                                                                                                               |
| GO:0030199~collagen fibril organization                                     | 5     | 0.59 | 0.0335638 | CYP1B1, SERPINF2, LUM, LOX, SERPINHI                                                                                                                             |
| GO:0070006~metalloaminopeptidase activity                                   | 4     | 0.47 | 0.0346764 | TRHDE, ERAP2, ANPEP, XPNPEP2                                                                                                                                     |

Table SII. Continued.

| Term                                                          | Count | %    | P-value   | Genes                                                                                                                                                         |
|---------------------------------------------------------------|-------|------|-----------|---------------------------------------------------------------------------------------------------------------------------------------------------------------|
| GO:0031490~chromatin DNA binding                              | 6     | 0.71 | 0.0358406 | ATOH1, PRDM14, HIST1H1D, HIST1H1A, GRHL3, MYOG                                                                                                                |
| GO:0009897~external side of plasma membrane                   | 13    | 1.54 | 0.0360588 | SELL, TNFRSF13C, TMCI, ANPEP, MFGE8, IL31RA, IL17A, CD34, CD69, CCR4, KLRC4-KLRK1, FAS, SCNN1B                                                                |
| GO:0051607~defense response to virus                          | 11    | 1.30 | 0.0362852 | AZU1, IFIT2, IFIT1, IFITM3, PYCARD, OAS1, IFI16, PMAIP1, TRIM22, GBP3, APOBEC3C                                                                               |
| GO:0045071~negative regulation of viral genome replication    | 5     | 0.59 | 0.0363969 | IFIT1, IFITM3, OAS1, IFI16, APOBEC3C                                                                                                                          |
| GO:0005623~cell                                               | 8     | 0.95 | 0.0370507 | LCN2, GCK, ERFE, HKDC1, NELL2, HK2, CCL8, MT4                                                                                                                 |
| GO:0051918~negative regulation of fibrinolysis                | 3     | 0.36 | 0.0376998 | THBD, SERPINF2, F2                                                                                                                                            |
| GO:0051156~glucose 6-phosphate metabolic process              | 3     | 0.36 | 0.0376998 | GCK, HKDC1, HK2                                                                                                                                               |
| GO:0042060~wound healing                                      | 7     | 0.83 | 0.0403035 | ALOX15, S100A8, VANGL2, PDGFRA, GRHL3, LOX, IL24                                                                                                              |
| GO:0042593~glucose homeostasis                                | 8     | 0.95 | 0.0403475 | CAV3, RBP4, SSTR5, GCK, FBN1, ADRA2A, ADRA1B, OAS1                                                                                                            |
| GO:0008307~structural constituent of muscle                   | 5     | 0.59 | 0.0427596 | KRT19, MYL2, ANKRD2, MYOT, MYL9                                                                                                                               |
| GO:0019369~arachidonic acid metabolic process                 | 4     | 0.47 | 0.0427673 | ALOX15, CYP11B1, ALOX12B, MGLL                                                                                                                                |
| GO:0005856~cytoskeleton                                       | 19    | 2.25 | 0.0438858 | CMAHP, S100A8, MYL2, ANKRA2, NOSTRIN, WIP1, ACTL8, FRMD3, FRMD6, ANK1, RNF128, FHOD3, AKAP5, ERC2, INPP5D, TGFB3, FAM83H, TEC, ARHGDI1B                       |
| GO:0006508~proteolysis                                        | 24    | 2.84 | 0.0445203 | KLK8, TRHDE, UFSP1, PRTN3, C3, CPQ, RBP3, COLEC10, ANPEP, TPSD1, NRIP2, TMEM27, XPNPEP2, GZMM, AZU1, MMP10, FAP, PRSS2, F2, DPEP3, KLK11, ERAP2, CPB1, PRSS37 |
| GO:0097202~activation of cysteine-type endopeptidase activity | 3     | 0.36 | 0.0451339 | PYCARD, CYFIP2, IFI16                                                                                                                                         |
| GO:0006497~protein lipidation                                 | 3     | 0.36 | 0.0451339 | ALOX12B, WIP1, MTTP                                                                                                                                           |
| GO:0004143~diacylglycerol kinase activity                     | 3     | 0.36 | 0.0453184 | DGKA, DGKB, DGKI                                                                                                                                              |
| GO:0051965~positive regulation of synapse assembly            | 6     | 0.71 | 0.0453964 | AMIGO1, CBLN1, LRTM1, LRRN1, ASIC2, ADGRB3                                                                                                                    |
| GO:0031012~extracellular matrix                               | 16    | 1.89 | 0.0455898 | ZPI, PRTN3, LUM, IGFBP7, FBN1, HSPG2, MFGE8, NID2, MMP10, LGALS3BP, SERPINF1, F3, PRSS2, AMELY, TGFB3, CSTA                                                   |
| GO:0042383~sarcolemma                                         | 7     | 0.83 | 0.0498193 | CAV3, FGF6, KRT19, ANK1, TRIM72, MYOT, CCDC78                                                                                                                 |

Table SIII. Pathway enrichment.

| Term                                         | Count | %    | P-value | Genes                                                                                                                                                                                                                                                                                                                                             |
|----------------------------------------------|-------|------|---------|---------------------------------------------------------------------------------------------------------------------------------------------------------------------------------------------------------------------------------------------------------------------------------------------------------------------------------------------------|
| hsa04115:p53 signaling pathway               | 9     | 1.07 | 0.00073 | CCNE2, CDKN1A, TP53I3, DDB2, MDM2, FAS, PMAIP1, SESN1, GADD45A                                                                                                                                                                                                                                                                                    |
| hsa04610:Complement and coagulation cascades | 8     | 0.95 | 0.00403 | THBD, C3, SERPINF2, F3, C6, C5, F2, C4BPB                                                                                                                                                                                                                                                                                                         |
| hsa00524:Butirosin and neomycin biosynthesis | 3     | 0.36 | 0.00817 | GCK, HKDC1, HK2                                                                                                                                                                                                                                                                                                                                   |
| hsa00590:Arachidonic acid metabolism         | 7     | 0.83 | 0.00883 | ALOX15, CYP2C8, PLA2G2A, EPHX2, ALOX12B, LTC4S, PLA2G2D                                                                                                                                                                                                                                                                                           |
| hsa00500:Starch and sucrose metabolism       | 5     | 0.59 | 0.01542 | PYGM, GCK, HKDC1, MGAM, HK2                                                                                                                                                                                                                                                                                                                       |
| hsa01100:Metabolic pathways                  | 47    | 5.56 | 0.04075 | INPP1, PLCZ1, PYCRL, FUT9, ASS1, COX7B2, HK2, ANPEP, LTC4S, ATP6V1B1, ACSBG1, AFMID, DGKA, DGKB, GALNTL5, B3GALNT1, GALNTL6, UGT2A2, ALOX12B, CDA, MGLL, BDH1, GAL3ST1, FAXDC2, SPTLC3, WBSCR17, HKDC1, CYP2C8, ACER2, HOGA1, EPHX2, DGKI, ACADL, IDNK, ALOX15, PYGM, GCK, MGAM, AOX1, PLA2G2A, QPRT, RDH16, ATP6V0A4, PLA2G2D, ALG12, PC, NMNAT1 |
